# Supplementary material for: A Qualitative study assessing organisational readiness to implement caregiver support programmes in Ontario, Canada
Source: PubMed Central journal article supplement — BMJ Open. 2020 May 24;10(5):e035559. doi: 10.1136/bmjopen-2019-035559 (PMC7252954; doi:10.1136/bmjopen-2019-035559), 2020-05-24
Supplement: bmjopen-2019-035559.draft_revisions.pdf [file bmjopen-2019-035559.draft_revisions.pdf]

# BMJ Open

BMJ Open is committed to open peer review. As part of this commitment we make the peer review history of every article we publish publicly available.

When an article is published we post the peer reviewers' comments and the authors' responses online. We also post the versions of the paper that were used during peer review. These are the versions that the peer review comments apply to.

The versions of the paper that follow are the versions that were submitted during the peer review process. They are not the versions of record or the final published versions. They should not be cited or distributed as the published version of this manuscript.

BMJ Open is an open access journal and the full, final, typeset and author-corrected version of record of the manuscript is available on our site with no access controls, subscription charges or pay-per-view fees (<http://bmjopen.bmj.com>).

If you have any questions on BMJ Open's open peer review process please email [info.bmjopen@bmj.com](mailto:info.bmjopen@bmj.com)

# BMJ Open

## A Qualitative Study Assessing Organizational Readiness to Implement Caregiver Support Programs

|                               |                                                                                                                                                                                                                                                                                                                                                                                                                                |
|-------------------------------|--------------------------------------------------------------------------------------------------------------------------------------------------------------------------------------------------------------------------------------------------------------------------------------------------------------------------------------------------------------------------------------------------------------------------------|
| Journal:                      | <i>BMJ Open</i>                                                                                                                                                                                                                                                                                                                                                                                                                |
| Manuscript ID                 | bmjopen-2019-035559                                                                                                                                                                                                                                                                                                                                                                                                            |
| Article Type:                 | Original research                                                                                                                                                                                                                                                                                                                                                                                                              |
| Date Submitted by the Author: | 06-Nov-2019                                                                                                                                                                                                                                                                                                                                                                                                                    |
| Complete List of Authors:     | Tseung, Victrine; University of Toronto Faculty of Medicine, Rehabilitation Sciences Institute<br>Jaglal, Susan; University of Toronto, Physical Therapy; Toronto Rehabilitation Institute<br>Salbach, Nancy; University of Toronto, Physical Therapy; Toronto Rehabilitation Institute<br>Cameron, Jill; University of Toronto, Department of Occupational Science and Occupational Therapy; Toronto Rehabilitation Institute |
| Keywords:                     | Stroke < NEUROLOGY, QUALITATIVE RESEARCH, Organisation of health services < HEALTH SERVICES ADMINISTRATION & MANAGEMENT, REHABILITATION MEDICINE                                                                                                                                                                                                                                                                               |
|                               |                                                                                                                                                                                                                                                                                                                                                                                                                                |

SCHOLARONE™  
Manuscripts

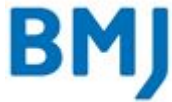

I, the Submitting Author has the right to grant and does grant on behalf of all authors of the Work (as defined in the below author licence), an exclusive licence and/or a non-exclusive licence for contributions from authors who are: i) UK Crown employees; ii) where BMJ has agreed a CC-BY licence shall apply, and/or iii) in accordance with the terms applicable for US Federal Government officers or employees acting as part of their official duties; on a worldwide, perpetual, irrevocable, royalty-free basis to BMJ Publishing Group Ltd ("BMJ") its licensees and where the relevant Journal is co-owned by BMJ to the co-owners of the Journal, to publish the Work in this journal and any other BMJ products and to exploit all rights, as set out in our [licence](#).

The Submitting Author accepts and understands that any supply made under these terms is made by BMJ to the Submitting Author unless you are acting as an employee on behalf of your employer or a postgraduate student of an affiliated institution which is paying any applicable article publishing charge ("APC") for Open Access articles. Where the Submitting Author wishes to make the Work available on an Open Access basis (and intends to pay the relevant APC), the terms of reuse of such Open Access shall be governed by a Creative Commons licence – details of these licences and which [Creative Commons](#) licence will apply to this Work are set out in our licence referred to above.

Other than as permitted in any relevant BMJ Author's Self Archiving Policies, I confirm this Work has not been accepted for publication elsewhere, is not being considered for publication elsewhere and does not duplicate material already published. I confirm all authors consent to publication of this Work and authorise the granting of this licence.

1  
2  
3  
4 **Running Head: Organizational Implementation of Caregiver Programs**  
5

6  
7 **Title: A Qualitative Study Assessing Organizational Readiness to Implement Caregiver**  
8 **Support Programs**  
9

10  
11  
12  
13 **Authors: Victrine Tseung, PhD, Susan B Jaglal, PhD, Nancy M Salbach, PhD, and Jill I**  
14 **Cameron, PhD**  
15

16  
17  
18  
19  
20  
21 **Victrine Tseung, PhD**

22  
23 **Rehabilitation Sciences Institute, Faculty of Medicine, University of Toronto**

24  
25 **160-500 University Ave**

26  
27 **Toronto, ON. Canada**

28  
29 **v.tseung@utoronto.ca**  
30  
31

32  
33  
34  
35 **Susan Jaglal, PhD FCAHS**

36  
37 **Toronto Rehabilitation Institute-UHN Chair**

38  
39 **Department of Physical Therapy, University of Toronto**

40  
41 **Associate Academic Director of Research TRI-UHN**

42  
43 **160-500 University Ave**

44  
45 **Toronto, ON M5G 1V7**

46  
47 **Susan.jaglal@utoronto.ca**  
48  
49

50  
51  
52  
53 **Nancy M. Salbach, PhD**  
54  
55

1  
2  
3 **Department of Physical Therapy, University of Toronto**

4  
5 **160-500 University Avenue**

6  
7  
8 **Toronto, ON M5G 1V7 Canada**

9  
10 **Nancy.salbach@utoronto.ca**

11  
12  
13  
14  
15 **Corresponding Author: Jill I. Cameron, PhD FAHA**

16  
17 **Department of Occupational Science and Occupational Therapy, Rehabilitation Sciences**

18  
19 **Institute, Faculty of Medicine, University of Toronto**

20  
21 **160-500 University Ave.**

22  
23  
24 **Toronto, ON M5G 1V7 Canada**

25  
26 **416-978-2041 (office)**

27  
28 **Jill.cameron@utoronto.ca**

29  
30 **Affiliate Scientist, UHN-Toronto Rehabilitation Institute**

31  
32 **Twitter: @caregiving\_UofT**

33  
34  
35  
36  
37  
38 **Funding:** This work was supported by a Ministry of Research and Innovation Early

39  
40  
41  
42  
43  
44  
45  
46  
47  
48  
49  
50  
51  
52  
53  
54  
55  
56  
57  
58  
59  
60  
Researcher Award (JIC), Queen Elizabeth II Graduate Student Award in Science and

Technology (VT) and a Knowledge Translation Canada Student Fellowship (VT).

**Word Count: 2541**

**Tables: 2**

## Abstract

**Objective:** To qualitatively explore factors affecting implementation of caregiver support programs in health care institutions in a regional stroke system.

**Design:** A qualitative descriptive study with the Ontario Stroke System (OSS) was conducted. Data were collected through focus groups and in-depth interviews. Transcripts were coded and analyzed using inductive thematic analysis.

**Setting:** Regional Stroke System, Ontario, Canada.

**Participants:** OSS stakeholders including medical directors, executives, program directors, education coordinators, rehabilitation and community and long-term care specialists, primary care leaders, and health care professionals.

**Intervention:** Not applicable.

**Main Outcome Measures:** Data collection explored perceptions of the need for caregiver support programs and factors that may affect their implementation.

**Results:** Four focus groups (n=43) and 29 interviews were completed. Analyses identified themes related to: 1) evidence that a caregiver program will improve health and health system outcomes; 2) personnel requirements; 3) barriers associated with current billing and referral processes; and 4) integration with current practice and existing workflow processes.

**Conclusions:** Implementation strategies to adopt caregiver programs into clinical practice should incorporate evidence and consider personnel and existing workflow processes.

**Keywords:** caregivers, stroke, organizations, qualitative research

**Abbreviations:**

OSS – Ontario Stroke System

FG – Focus Group

HCP – Health Care Professionals

MD – Medical Directors

RE – Regional Health Executives

PL – Primary Care Leaders

PRISMA – Program of Research to Integrate the Services for the Maintenance of Autonomy

ADLs – Activities of Daily Living

## Article Summary

### Strengths and Limitations of this study

- Our study used in-depth qualitative methods to be the first study to explore organizational considerations for implementing caregiver programs in a regional stroke system.
- Our study included 72 participants reflecting key stakeholder groups responsible for supporting caregivers and implementing caregiver programs within institutions.
- Additional stakeholder groups (e.g., hospital managers) could have provided additional perspectives on caregiver program implementation.
- More in-depth probing of the specific challenges experienced in rural areas would have expanded our findings.



## Introduction

Family caregivers play a central role in the recovery, rehabilitation, and community re-integration of individuals who experience a stroke. Numerous studies have documented the negative impact providing care can have on caregiver health and wellbeing (1, 2). Previous literature recommends the use of multi-component interventions (3) that cross the care continuum (4, 5) to meet caregivers' needs for support. However, caregivers are not benefiting from these programs, as they are not being incorporated into standard clinical practice (6, 7). Research from the United Kingdom, identified program and system level factors that limited the implementation of a stroke caregiver program into clinical practice (8, 9). Participants reported lack of time and individuals responsible for ensuring implementation as limiting factors. Our research with the Ontario Stroke System (OSS) (10, 11) has indicated a need to understand implementation of caregiver programs within institutions. Therefore, the objective of this study was to examine factors that influence implementation of caregiver programs within institutions.

## Methods

### Design

We conducted a qualitative descriptive study (12) and used the used the SRQR reporting guidelines (13). Participants were recruited from the OSS – regional system of stroke care. Institutional ethics boards, including the University of Toronto Research Ethics Board, approved the study. All participants provided written consent. This study was situated in the Knowledge-to-Action Framework's (14) barrier assessment step to identify facilitators and barriers in the

1  
2  
3 local context. The Consolidated Framework for Implementation Research (15) informed data  
4  
5 collection.  
6

### 7 **Patient and Public Involvement**

8  
9  
10 Patients and the public were not involved in the design of this research. Participants, as described  
11  
12 below, were involved in this research through in-depth interviews and focus groups where they  
13  
14 contributed their thoughts about caregivers and program implementation. Findings have been  
15  
16 presented at local and national stroke conferences which is commonly attended by many  
17  
18 participants. They will receive copies of publications.  
19  
20

### 21 **Participants**

22  
23  
24 Participants were recruited from the 11 OSS regions including: Program Directors,  
25  
26 Rehabilitation Specialists, Community and Long-Term Care Specialists, Education Coordinators,  
27  
28 Medical Directors, and health care professionals providing stroke care in acute, rehabilitation,  
29  
30 and community settings, and from the broader health care system including regional health  
31  
32 executives, and primary care leaders.  
33  
34

### 35 **Data Collection**

36  
37  
38 Participants were asked to discuss: 1) perceptions of the availability, importance, and  
39  
40 effectiveness of caregiver programs; 2) current practices related to caregiver education and  
41  
42 support; and 3) program level implementation considerations. Qualitative interviews and focus  
43  
44 groups were audio-recorded, transcribed verbatim, reviewed for accuracy, and de-identified.  
45  
46

47 Data can be accessed by contacting the corresponding author.  
48  
49  
50  
51  
52  
53  
54  
55  
56

## Data Analysis

Data was analyzed using inductive thematic analysis (16) and facilitated using NVivo (17). To maximize the credibility of the findings, all authors reviewed data and contributed to theme generation (18).

## Results

Four focus groups (n=43) and 29 interviews yielded 72 participants (see tables 1 and 2). Four themes related to: 1) need for evidence that a caregiver program will improve patient and caregiver health and health system outcomes after “real world” implementation; 2) personnel requirements; 3) barriers associated with current billing and referral processes; and 4) integration with current practice and workflow processes. Participant quotations from focus groups (FG) and interviews with health care professionals (HCP), medical directors (MD), regional health executives (RE), and primary care leaders (PL) are identified by number.

**Table 1: Professional role of participants:** A summary of study participants’ professional roles.

| Participant Group                             | Number of Participants (n=72)* |
|-----------------------------------------------|--------------------------------|
| Regional/District Program Directors (FG)      | 19                             |
| Community and Long-Term Care Specialists (FG) | 7                              |
| Regional Education Coordinators (FG)          | 7                              |
| Regional Rehabilitation Specialists (FG)      | 11                             |
| Regional Medical Directors (INT)              | 2                              |
| Health Region Executives (INT)                | 4                              |

| <b>Participant Group</b>               | <b>Number of Participants (n=72)*</b> |
|----------------------------------------|---------------------------------------|
| Health Region Primary Care Leads (INT) | 4                                     |
| Health Care Professionals (INT)        | 19                                    |

Abbreviations: FG, focus group; INT, interview.

\*One participant had a dual role.

**Table 2: Health Care Professionals by Sector and Occupation:** A summary of study participants' clinical sector and profession.

| <b>Health Care Professionals by Sector and Occupation (N=19)</b> |                               |
|------------------------------------------------------------------|-------------------------------|
| <b>Sector</b>                                                    | <b>Number of Participants</b> |
| Acute                                                            | 5                             |
| Rehabilitation                                                   | 7                             |
| Community                                                        | 6                             |
| Private                                                          | 1                             |
| <b>Profession</b>                                                |                               |
| Occupational Therapist                                           | 5                             |
| Physical Therapist                                               | 4                             |
| Speech Language Pathologist                                      | 3                             |
| Physiatrist/Recreational Therapist/Stroke Care Navigator         | 3                             |
| Registered Nurse                                                 | 2                             |
| Social Worker                                                    | 2                             |

1  
2  
3  
4  
5  
6 **Theme 1: Need for evidence that a caregiver program will improve patient and caregiver**  
7 **health and health system outcomes after “real world” implementation**  
8

9  
10 Participants discussed the role of evidence, including program evaluation, to support  
11 funding, implementation, and sustainability of caregiver programs. Participants suggest  
12 stakeholders differ in their preferences for process (e.g., program attendance) or outcomes (e.g.,  
13 health and health system outcomes) data. For example, some prefer numerical data to support  
14 implementation (e.g., program attendance) while others are looking for success stories (e.g.,  
15 patient stories). The following quotation describes the roles of pilot testing and program  
16 evaluation to sustain implementation in practice:  
17  
18  
19  
20  
21  
22  
23  
24  
25

26 But the point I’m trying to get across is that...the organization if they see...there’s research  
27 to back up the effectiveness of it [caregiver program]...then they’ll pilot it... to see if it’s  
28 working, and then...upper management...they’ll look at the number of people who are  
29 taking advantage of the programs cause it all comes down to numbers for organizations,  
30 right. And...if it is working right then that pilot program can become...a regular program  
31 that the hospital runs and incorporates as a part of their budget. (HCP 19)  
32  
33  
34  
35  
36  
37  
38  
39

40 **Theme 2: Personnel Requirements**  
41

42 Many participants agreed that existing team members would not be able to assume this  
43 added responsibility so a new role was needed. In terms of creating a new role, three  
44 considerations were discussed: 1) similarity with existing roles; 2) integration into a community-  
45 based navigator role; and 3) integration into health care teams in acute and rehabilitation settings.  
46  
47 A few participants highlighted the overlap with existing roles (e.g., community care case  
48 managers) so this role would need to be clearly defined:  
49  
50  
51  
52  
53  
54  
55  
56  
57  
58  
59  
60

1  
2  
3 ...defining whose role is what and again who's responsible for what, because if you're  
4 doing a quarter of the discharge planner's job and you're doing thirty percent of the family  
5 doctor's job...there's too much duplication in the hospital and in the health care. (HCP 15)  
6  
7  
8  
9

10 Some participants spoke about the navigator role in which an individual supports patients  
11 and families in the community. Perspectives differed as to the possibility of integrating caregiver  
12 support into this role as their availability and function varied by region: "...not every region has  
13 a navigator...and those that do they function very differently" (FG 3).  
14  
15  
16  
17  
18

19 Participants questioned the feasibility of having a position that crosses care environments  
20 because current practice does not include contact with patients and their caregivers after they  
21 leave the institution. While they indicated the desire for a single point of contact for caregiver  
22 support, they spoke about the challenge of determining funding sources and sustainability with  
23 current fiscal restraints. The following quotation raises the issue of funding and ownership for  
24 this role, particularly in cases where acute and rehabilitation care are separate institutions:  
25  
26  
27  
28  
29  
30  
31  
32

33 This acute person follows the patient through their rehab stay to community...how does  
34 that work when it's [rehab] a separate facility? Like the ownership ... that's why the idea  
35 of dedicated resources seems to be a good fit to overcome that barrier because if you think  
36 about it, if someone's being paid by [hospital A] to handle [hospital A] patients and...and  
37 they're off to another...that's what I'm thinking is a barrier for you... (FG 4)  
38  
39  
40  
41  
42  
43  
44

45 The increasingly large caseload this single person would have to manage was also  
46 mentioned as a concern for the feasibility of this approach: "...just by the nature of the beast it's  
47 most likely that you're going to...need a few of these individuals...because their caseload is  
48 going to just get bigger and bigger..." (FG 4). Instead, some participants suggested that caregiver  
49 support be organized by care environment with health care teams picking up the education where  
50  
51  
52  
53  
54  
55

1  
2  
3 the last team finished. The following quotation provides an example: “I can see it working  
4 as...the stroke nurse’s role to take it from point A to point B and then...it would be the social  
5 worker and rehab’s role to be from this section to this section and then it would be the  
6 community navigator or the outpatient OT...to be taken to the next stage...” (FG 3).  
7  
8  
9

10  
11  
12 In addition, some participants felt that it may be more likely to be funded if it was used  
13 region-wide. However, in geographically larger stroke regions, it would be very challenging for  
14 one individual to cover the entire region:  
15  
16  
17

18  
19 And the individual has to be a regional resource versus organizational. So they can’t  
20 necessarily belong to a specific hospital but they have to have the capacity to cover a  
21 region and be flexible in that...which is a barrier up north. (FG 2)  
22  
23  
24  
25

26 Participants had different perspectives regarding the role of health care professionals in  
27 providing caregiver support. This individual would need to be knowledgeable about acute care,  
28 rehabilitation, and community care and to stay up-to-date with community resources. He or she  
29 would have counseling skills and a good understanding of each of the disciplines on the health  
30 care team. Some participants provided examples of specific health care professionals they  
31 perceived to be most appropriate for this role, including occupational therapists, social workers,  
32 nurses, and other allied health professionals.  
33  
34  
35  
36  
37  
38  
39  
40  
41

42 Participants questioned the use of trained volunteers or non-health care professionals.  
43 Some of the regional health executives discussed the limited availability and high costs of health  
44 care professionals as the main reasons to consider volunteers. The following quotation highlights  
45 this point: “So it may be a costly model if the person is a health care professional. There may be  
46 other models where you use peers, somebody who’s had a similar experience or volunteers who  
47 have been trained” (RE 4). However, there might be instances when the issues facing the  
48  
49  
50  
51  
52  
53  
54  
55  
56  
57  
58  
59  
60

1  
2  
3 families are predominantly medical in nature, and these personnel may not be able to address  
4  
5 such issues:

6  
7 ...the challenge would be and we've seen it with community navigators when it's an  
8  
9 orphan patient and we have a community navigator following them but all their issues are  
10  
11 medical...that community navigator is not equipped to provide advice or to plan any  
12  
13 intervention other than to say go to a walk in clinic or et cetera. And that then it becomes  
14  
15 a challenge for both parties. (FG 1)  
16  
17  
18

### 19 **Theme 3: Barriers associated with current billing and referral processes**

20  
21 Participants agreed that existing infrastructure should incorporate caregiver programs.  
22  
23 However, participants identified several challenges. Health care professionals and Rehabilitation  
24  
25 Specialists suggested that organizational referral criteria and government-funded health  
26  
27 insurance precludes caregivers from being formal units of care. One participant explained that  
28  
29 there are community-based activities that would be appropriate for the patient-caregiver dyad,  
30  
31 but because the organization's mandate is to provide services to individuals with disabilities and  
32  
33 there is no billing structure for services provided to caregivers, caregivers are not included. The  
34  
35 following quotation demonstrates how the current billing structure and referral criteria hinder the  
36  
37 provision of caregiver support within health care organizations:  
38  
39  
40  
41

42 Let's say we register the caregiver as a patient, then they need a chart. Then they need  
43  
44 space in health records. Like then we have to track them that way...if the caregiver now  
45  
46 becomes the patient then you need to refer them to mental health if that's the issue. Do you  
47  
48 know what I mean...So whether or not our institution would adopt that would be really  
49  
50 interesting to see. I doubt it...Cause then a cost comes in. (HCP 10)  
51  
52  
53  
54  
55  
56  
57  
58  
59  
60



#### **Theme 4: Integration with current practice and existing workflow processes**

Participants discussed four facilitators to the integration of caregiver support into current practice and existing workflow processes. Potential challenges were also discussed.

First, participants suggested the caregiver support role should become part of routine practice. This approach may overcome limited therapist time to provide support in both inpatient and community care.

Second, participants were concerned with incorporating caregiver support into patient charts. A few participants indicated that there are no places in patient charts to document the specific education provided. If education became required practice, the tendency might be to provide the support for the sake of checking off the box as opposed to paying attention to the content, timing, or the readiness of the caregiver to receive this information. The following quotation underscores the challenges with incorporating caregiver support into existing documentation, particularly when these programs cross care environments:

...so if there is a way to [tick off] have you done your section of [caregiver program] ...you would almost have to be embedded in documentation somehow too so that it is not missed and that would be hard because... once that patient is gone, so is their chart...you are not even supposed to go into the chart after... (FG 3)

Third, participants emphasized communication between the individual providing caregiver support and the rest of the care team to ensure consistency and continuity in messaging to caregivers. This was noted as a challenge in community care because team members do not necessarily communicate with one another or know who else is working with the patient.

Lastly, participants highlighted the importance of having a formalized and structured approach to guide implementation. This would require ready-made materials that can be adapted

1  
2  
3 to local contexts, developing a clear referral and monitoring system, setting target user criteria,  
4 and establishing a mechanism for re-accessing caregivers if they initially decline the program.  
5  
6 Participants suggested some health care professions would need education and tools to assess  
7  
8 caregivers' needs and provide appropriate supports. Training may also enhance soft skills as  
9  
10 many health care professionals may be more comfortable with the more technical aspects of their  
11  
12 clinical work.  
13  
14  
15

### 16 17 **Discussion** 18

19 The objective of this study was to identify factors that influence implementation of  
20  
21 caregiver programs within institutions. The four themes suggest that the availability of evidence  
22  
23 to support program outcomes, personnel requirements, and a supportive structure including  
24  
25 billing, workflow and resources are important for caregiver program implementation.  
26  
27

28 As we aim to support transitions across the care continuum (4, 5, 19, 20), our findings  
29  
30 suggest one potential approach to implementing a program that crosses care environments. This  
31  
32 would involve offering a program across care environments with health care teams picking up  
33  
34 the education where the last team finished. Caregivers, however, prefer having one individual  
35  
36 provide support across the care continuum (21). One possible solution to address these  
37  
38 differences in perspectives comes from the aging literature. Stroke care could adopt an integrated  
39  
40 service delivery model such as one proposed for the frail elderly. The PRISMA (Program of  
41  
42 Research to Integrate the Services for the Maintenance of Autonomy) model uses case managers  
43  
44 to coordinate and monitor the needs of frail elderly across care environments and has  
45  
46 demonstrated positive impacts on patient and caregiver health, and health care utilization (22,  
47  
48 23). The applicability of this service delivery model to stroke care warrants further consideration.  
49  
50  
51  
52  
53  
54  
55  
56  
57  
58  
59  
60

Participant responses indicated that occupational therapists are one of the health care professionals who would be suitable to deliver caregiver support. Occupational therapists are a core member of multi-disciplinary stroke teams and they contribute to caregiver training (e.g., teaching ADLs) (24, 25). Beyond training in ADLs, occupational therapists' training in mental health and meaningful occupations prepares them for addressing the psychosocial effects of caregiving (24). There is a need to address caregivers' needs such that they are able to maintain both their own health and engagement in valued activities and provide care for their loved ones (26). This previous research (26) and our study findings highlight occupational therapists as a potential source of support for caregivers.

Current billing structures and referral criteria preclude the provision of services to caregivers in standard clinical practice. This suggests a need to expand organizational structures for billing, referral and documentation to include caregiver support. As demonstrated in the PRISMA model, information systems (e.g., computerized client chart that is available across organizations) can be developed to overcome organizational structures (22). The integration of caregivers into information systems can facilitate program implementation (9).

## Article Summary

### Strengths and Limitations of this study

- Our study used in-depth qualitative methods to be the first study to explore organizational considerations for implementing caregiver programs in a regional stroke system.
- Our study included 72 participants reflecting key stakeholder groups responsible for supporting caregivers and implementing caregiver programs within institutions.

- Additional stakeholder groups (e.g., hospital managers) could have provided additional perspectives on caregiver program implementation.
- More in-depth probing of the specific challenges experienced in rural areas would have expanded our findings.

In summary, our study was one of the first to examine implementation of caregiver programs within a regional stroke system. It adds to the existing literature by delineating implementation considerations and highlighting the potential role for occupational therapists as providers of caregiver support.

### **Conflict of Interest**

Authors have no conflicts of interest to declare.

### **Author Contributions**

VT contributed to the project conceptualization and design, data acquisition and qualitative interviewing, coding and data analysis, theme generation, drafting and revising the manuscript.

SJ contributed to project conceptualization and design, qualitative data analysis, theme generation and revisions to the final manuscript.

NMS contributed to project conceptualization and design, qualitative data analysis, theme generation and revisions to the final manuscript.

JIC contributed to the project conceptualization and design, qualitative data analysis, theme generation, drafting and revising the manuscript.

## References

1. Rigby H, Gubitz G, Phillips S. A systematic review of caregiver burden following stroke. *Int J Stroke*. 2009;4(4):285-92.
2. Gaugler JE. The longitudinal ramifications of stroke caregiving: a systematic review. *REHABIL PSYCHOL*. 2010;55(2):108-25.
3. White cL, Cantu, A.G., Trevino, M.M. Interventions for caregivers of stroke survivors: An update of the evidence. *Clinical Nursing Studies*. 2015;3(3):9.
4. Cameron JI, Naglie G, Gignac MA, Bayley M, Warner G, Green T, et al. Randomized clinical trial of the timing it right stroke family support program: research protocol. *BMC Health Serv Res*. 2014;14:18.
5. Cameron JI, Naglie G, Green TL, Gignac MA, Bayley M, Huijbregts M, et al. A feasibility and pilot randomized controlled trial of the "Timing it Right Stroke Family Support Program". *Clin Rehabil*. 2014.
6. Rochette A, Korner-Bitensky N, Desrosiers J. Actual vs best practice for families post-stroke according to three rehabilitation disciplines. *J Rehabil Med*. 2007;39(7):513-9.
7. Rochette A, Racine E, Lefebvre H, Bastien J, Tellier M. Actual and ideal services in acute care and rehabilitation for relatives post-stroke from three perspectives: Relatives, stroke clients and health professionals. *J Rehabil Med*. 2014;46(1):16-22.
8. Clarke DJ, Hawkins R, Sadler E, Harding G, McKeivitt C, Godfrey M, et al. Introducing structured caregiver training in stroke care: findings from the TRACS process evaluation study. *BMJ Open*. 2014;4(4):e004473.
9. Clarke DJ, Godfrey M, Hawkins R, Sadler E, Harding G, Forster A, et al. Implementing a training intervention to support caregivers after stroke: a process evaluation examining the initiation and embedding of programme change. *Implement Sci*. 2013;8:96.
10. Tseung V, Jaglal, S., Salbach, N., Yoshida, K. & Cameron, J.I. . Key informants' perspectives on implementing stroke caregiver programs. *Disabil Rehabil*. 2019;in press.
11. Tseung V, Jaglal SB, Salbach NM, Cameron JI. Implementing Caregiver Support Programs in a Regional Stroke System. *Stroke*. 2019:STROKEAHA119026660.
12. Sandelowski M. What's in a name? Qualitative description revisited. *Res Nurs Health*. 2010;33(1):77-84.
13. O'Brien BC, Harris IB, Beckman TJ, Reed DA, Cook DA. Standards for reporting qualitative research: a synthesis of recommendations. *Acad Med*. 2014;89(9):1245-51.
14. Graham ID, Logan J, Harrison MB, Straus SE, Tetroe J, Caswell W, et al. Lost in knowledge translation: time for a map? *J Contin Educ Health Prof*. 2006;26(1):13-24.
15. Damschroder LJ, Aron DC, Keith RE, Kirsh SR, Alexander JA, Lowery JC. Fostering implementation of health services research findings into practice: a consolidated framework for advancing implementation science. *Implement Sci*. 2009;4:50.
16. Braun V, Clarke V. Using thematic analysis in psychology. *Qualitative Research in Psychology*. 2006;3(2):77-101.
17. NVivo qualitative data analysis software. 10.0 ed: QSR International Pty Ltd.; 2012.

18. McReynolds CJ, Koch LC, Rumrill PD, Jr. Speaking of research. Qualitative research strategies in rehabilitation. *WORK: A Journal of Prevention, Assessment & Rehabilitation*. 2001;16(1):57-65.
19. Cameron JI, Tsoi C, Marsella A. Optimizing stroke systems of care by enhancing transitions across care environments. *Stroke*. 2008;39(9):2637-43.
20. Cameron JI, O'Connell C, Foley N, Salter K, Booth R, Boyle R, et al. Canadian Stroke Best Practice Recommendations: Managing transitions of care following Stroke, Guidelines Update 2016. *Int J Stroke*. 2016;11(7):807-22.
21. Cameron JI, Naglie G, Silver FL, Gignac MA. Stroke family caregivers' support needs change across the care continuum: a qualitative study using the timing it right framework. *Disabil Rehabil*. 2013;35(4):315-24.
22. Hebert R, Durand PJ, Dubuc N, Tourigny A. PRISMA: a new model of integrated service delivery for the frail older people in Canada. *International Journal of Integrated Care*. 2003;3:1-8.
23. Hebert R, Raiche M, Dubois MF, Gueye NR, Dubuc N, Tousignant M, et al. Impact of PRISMA, a coordination-type integrated service delivery system for frail older people in Quebec (Canada): A quasi-experimental study. *J Gerontol B Psychol Sci Soc Sci*. 2010;65B(1):107-18.
24. Moghimi C. Issues in Caregiving: The Role of Occupational Therapy in Caregiver Training. *Topics in Geriatric Rehabilitation*. 2007;23(3):11.
25. Lawson S, Rowe, A., Meredith, Y.Y. . Survey of Stroke Caregiver Training provided by OT, PT, and SLP across Practice Settings. *Physical and Occupational Therapy*. 2015;33(4):36.
26. Pellerin C, Rochette A, Racine E. Social participation of relatives post-stroke: the role of rehabilitation and related ethical issues. *Disabil Rehabil*. 2011;33(13-14):1055-64.

## Standards for Reporting Qualitative Research (SRQR)\*

<http://www.equator-network.org/reporting-guidelines/srqr/>

Page/line no(s).

### Title and abstract

|                                                                                                                                                                                                                                                              |        |
|--------------------------------------------------------------------------------------------------------------------------------------------------------------------------------------------------------------------------------------------------------------|--------|
| <p><b>Title</b> - Concise description of the nature and topic of the study Identifying the study as qualitative or indicating the approach (e.g., ethnography, grounded theory) or data collection methods (e.g., interview, focus group) is recommended</p> | Page 1 |
| <p><b>Abstract</b> - Summary of key elements of the study using the abstract format of the intended publication; typically includes background, purpose, methods, results, and conclusions</p>                                                               | Page 3 |

### Introduction

|                                                                                                                                                                     |        |
|---------------------------------------------------------------------------------------------------------------------------------------------------------------------|--------|
| <p><b>Problem formulation</b> - Description and significance of the problem/phenomenon studied; review of relevant theory and empirical work; problem statement</p> | Page 6 |
| <p><b>Purpose or research question</b> - Purpose of the study and specific objectives or questions</p>                                                              | Page 6 |

### Methods

|                                                                                                                                                                                                                                                                                                                                                                                                             |        |
|-------------------------------------------------------------------------------------------------------------------------------------------------------------------------------------------------------------------------------------------------------------------------------------------------------------------------------------------------------------------------------------------------------------|--------|
| <p><b>Qualitative approach and research paradigm</b> - Qualitative approach (e.g., ethnography, grounded theory, case study, phenomenology, narrative research) and guiding theory if appropriate; identifying the research paradigm (e.g., postpositivist, constructivist/ interpretivist) is also recommended; rationale**</p>                                                                            | Page 6 |
| <p><b>Researcher characteristics and reflexivity</b> - Researchers' characteristics that may influence the research, including personal attributes, qualifications/experience, relationship with participants, assumptions, and/or presuppositions; potential or actual interaction between researchers' characteristics and the research questions, approach, methods, results, and/or transferability</p> | n/a    |
| <p><b>Context</b> - Setting/site and salient contextual factors; rationale**</p>                                                                                                                                                                                                                                                                                                                            | Page 6 |
| <p><b>Sampling strategy</b> - How and why research participants, documents, or events were selected; criteria for deciding when no further sampling was necessary (e.g., sampling saturation); rationale**</p>                                                                                                                                                                                              | Page 7 |
| <p><b>Ethical issues pertaining to human subjects</b> - Documentation of approval by an appropriate ethics review board and participant consent, or explanation for lack thereof; other confidentiality and data security issues</p>                                                                                                                                                                        | Page 6 |
| <p><b>Data collection methods</b> - Types of data collected; details of data collection procedures including (as appropriate) start and stop dates of data collection and analysis, iterative process, triangulation of sources/methods, and modification of procedures in response to evolving study findings; rationale**</p>                                                                             | Page 7 |



|    |                                                                                         |        |
|----|-----------------------------------------------------------------------------------------|--------|
| 1  |                                                                                         |        |
| 2  | <b>Data collection instruments and technologies</b> - Description of instruments (e.g., |        |
| 3  | interview guides, questionnaires) and devices (e.g., audio recorders) used for data     |        |
| 4  | collection; if/how the instrument(s) changed over the course of the study               | Page 7 |
| 5  |                                                                                         |        |
| 6  | <b>Units of study</b> - Number and relevant characteristics of participants, documents, |        |
| 7  | or events included in the study; level of participation (could be reported in results)  | Page 7 |
| 8  |                                                                                         |        |
| 9  | <b>Data processing</b> - Methods for processing data prior to and during analysis,      |        |
| 10 | including transcription, data entry, data management and security, verification of      |        |
| 11 | data integrity, data coding, and anonymization/de-identification of excerpts            | Page 7 |
| 12 |                                                                                         |        |
| 13 | <b>Data analysis</b> - Process by which inferences, themes, etc., were identified and   |        |
| 14 | developed, including the researchers involved in data analysis; usually references a    |        |
| 15 | specific paradigm or approach; rationale**                                              | Page 7 |
| 16 |                                                                                         |        |
| 17 | <b>Techniques to enhance trustworthiness</b> - Techniques to enhance trustworthiness    |        |
| 18 | and credibility of data analysis (e.g., member checking, audit trail, triangulation);   |        |
| 19 | rationale**                                                                             | Page 7 |
| 20 |                                                                                         |        |

## Results/findings

|    |                                                                                             |            |
|----|---------------------------------------------------------------------------------------------|------------|
| 21 |                                                                                             |            |
| 22 |                                                                                             |            |
| 23 | <b>Synthesis and interpretation</b> - Main findings (e.g., interpretations, inferences, and |            |
| 24 | themes); might include development of a theory or model, or integration with                |            |
| 25 | prior research or theory                                                                    | Pages 8-15 |
| 26 |                                                                                             |            |
| 27 | <b>Links to empirical data</b> - Evidence (e.g., quotes, field notes, text excerpts,        |            |
| 28 | photographs) to substantiate analytic findings                                              | Pages 8-15 |
| 29 |                                                                                             |            |

## Discussion

|    |                                                                                           |             |
|----|-------------------------------------------------------------------------------------------|-------------|
| 30 |                                                                                           |             |
| 31 |                                                                                           |             |
| 32 | <b>Integration with prior work, implications, transferability, and contribution(s) to</b> |             |
| 33 | <b>the field</b> - Short summary of main findings; explanation of how findings and        |             |
| 34 | conclusions connect to, support, elaborate on, or challenge conclusions of earlier        |             |
| 35 | scholarship; discussion of scope of application/generalizability; identification of       |             |
| 36 | unique contribution(s) to scholarship in a discipline or field                            | Pages 15-16 |
| 37 |                                                                                           |             |
| 38 | <b>Limitations</b> - Trustworthiness and limitations of findings                          | Pages 16-17 |
| 39 |                                                                                           |             |

## Other

|    |                                                                                            |            |
|----|--------------------------------------------------------------------------------------------|------------|
| 40 |                                                                                            |            |
| 41 |                                                                                            |            |
| 42 | <b>Conflicts of interest</b> - Potential sources of influence or perceived influence on    |            |
| 43 | study conduct and conclusions; how these were managed                                      | n/a        |
| 44 |                                                                                            |            |
| 45 | <b>Funding</b> - Sources of funding and other support; role of funders in data collection, |            |
| 46 | interpretation, and reporting                                                              | Title page |
| 47 |                                                                                            |            |

\*The authors created the SRQR by searching the literature to identify guidelines, reporting standards, and critical appraisal criteria for qualitative research; reviewing the reference lists of retrieved sources; and contacting experts to gain feedback. The SRQR aims to improve the transparency of all aspects of qualitative research by providing clear standards for reporting qualitative research.

1  
2  
3  
4  
5  
6  
7  
8  
9  
10  
11  
12  
13  
14  
15  
16  
17  
18  
19  
20  
21  
22  
23  
24  
25  
26  
27  
28  
29  
30  
31  
32  
33  
34  
35  
36  
37  
38  
39  
40  
41  
42  
43  
44  
45  
46  
47  
48  
49  
50  
51  
52  
53  
54  
55  
56  
57  
58  
59  
60

\*\*The rationale should briefly discuss the justification for choosing that theory, approach, method, or technique rather than other options available, the assumptions and limitations implicit in those choices, and how those choices influence study conclusions and transferability. As appropriate, the rationale for several items might be discussed together.

**Reference:**

O'Brien BC, Harris IB, Beckman TJ, Reed DA, Cook DA. **Standards for reporting qualitative research: a synthesis of recommendations.** *Academic Medicine*, Vol. 89, No. 9 / Sept 2014  
DOI: 10.1097/ACM.0000000000000388

For peer review only

# BMJ Open

## A Qualitative Study Assessing Organizational Readiness to Implement Caregiver Support Programs in Ontario, Canada

|                                 |                                                                                                                                                                                                                                                                                                                                                                                                                                                                        |
|---------------------------------|------------------------------------------------------------------------------------------------------------------------------------------------------------------------------------------------------------------------------------------------------------------------------------------------------------------------------------------------------------------------------------------------------------------------------------------------------------------------|
| Journal:                        | <i>BMJ Open</i>                                                                                                                                                                                                                                                                                                                                                                                                                                                        |
| Manuscript ID                   | bmjopen-2019-035559.R1                                                                                                                                                                                                                                                                                                                                                                                                                                                 |
| Article Type:                   | Original research                                                                                                                                                                                                                                                                                                                                                                                                                                                      |
| Date Submitted by the Author:   | 27-Feb-2020                                                                                                                                                                                                                                                                                                                                                                                                                                                            |
| Complete List of Authors:       | Tseung, Victrine; University of Toronto Faculty of Medicine, Rehabilitation Sciences Institute<br>Jaglal, Susan; University of Toronto Faculty of Medicine, Physical Therapy; Toronto Rehabilitation Institute<br>Salbach, Nancy; University of Toronto, Physical Therapy; Toronto Rehabilitation Institute<br>Cameron, Jill; University of Toronto Faculty of Medicine, Department of Occupational Science and Occupational Therapy; Toronto Rehabilitation Institute |
| <b>Primary Subject Heading</b>: | Rehabilitation medicine                                                                                                                                                                                                                                                                                                                                                                                                                                                |
| Secondary Subject Heading:      | Health services research                                                                                                                                                                                                                                                                                                                                                                                                                                               |
| Keywords:                       | Stroke < NEUROLOGY, QUALITATIVE RESEARCH, Organisation of health services < HEALTH SERVICES ADMINISTRATION & MANAGEMENT, REHABILITATION MEDICINE                                                                                                                                                                                                                                                                                                                       |
|                                 |                                                                                                                                                                                                                                                                                                                                                                                                                                                                        |

SCHOLARONE™  
Manuscripts



I, the Submitting Author has the right to grant and does grant on behalf of all authors of the Work (as defined in the below author licence), an exclusive licence and/or a non-exclusive licence for contributions from authors who are: i) UK Crown employees; ii) where BMJ has agreed a CC-BY licence shall apply, and/or iii) in accordance with the terms applicable for US Federal Government officers or employees acting as part of their official duties; on a worldwide, perpetual, irrevocable, royalty-free basis to BMJ Publishing Group Ltd ("BMJ") its licensees and where the relevant Journal is co-owned by BMJ to the co-owners of the Journal, to publish the Work in this journal and any other BMJ products and to exploit all rights, as set out in our [licence](#).

The Submitting Author accepts and understands that any supply made under these terms is made by BMJ to the Submitting Author unless you are acting as an employee on behalf of your employer or a postgraduate student of an affiliated institution which is paying any applicable article publishing charge ("APC") for Open Access articles. Where the Submitting Author wishes to make the Work available on an Open Access basis (and intends to pay the relevant APC), the terms of reuse of such Open Access shall be governed by a Creative Commons licence – details of these licences and which [Creative Commons](#) licence will apply to this Work are set out in our licence referred to above.

Other than as permitted in any relevant BMJ Author's Self Archiving Policies, I confirm this Work has not been accepted for publication elsewhere, is not being considered for publication elsewhere and does not duplicate material already published. I confirm all authors consent to publication of this Work and authorise the granting of this licence.

1  
2  
3  
4 **Running Head: Organizational Implementation of Caregiver Programs**  
5

6  
7 **Title: A Qualitative Study Assessing Organizational Readiness to Implement Caregiver**  
8 **Support Programs in Ontario, Canada.**  
9

10  
11  
12  
13 **Authors: Victrine Tseung, PhD, Susan B Jaglal, PhD, Nancy M Salbach, PhD, and Jill I**  
14 **Cameron, PhD**  
15

16  
17  
18  
19  
20  
21 **Victrine Tseung, PhD**

22  
23 **Rehabilitation Sciences Institute, Faculty of Medicine, University of Toronto**

24  
25 **160-500 University Ave**

26  
27 **Toronto, ON. Canada**

28  
29 **v.tseung@utoronto.ca**  
30  
31

32  
33  
34  
35 **Susan Jaglal, PhD FCAHS**

36  
37 **Toronto Rehabilitation Institute-UHN Chair**

38  
39 **Department of Physical Therapy, University of Toronto**

40  
41 **Associate Academic Director of Research TRI-UHN**

42  
43 **160-500 University Ave**

44  
45 **Toronto, ON M5G 1V7**

46  
47 **Susan.jaglal@utoronto.ca**  
48  
49

50  
51  
52  
53 **Nancy M. Salbach, PhD**  
54  
55

1  
2  
3 **Department of Physical Therapy, University of Toronto**

4  
5 **160-500 University Avenue**

6  
7  
8 **Toronto, ON M5G 1V7 Canada**

9  
10 **Nancy.salbach@utoronto.ca**

11  
12  
13  
14  
15 **Corresponding Author: Jill I. Cameron, PhD FAHA**

16  
17 **Department of Occupational Science and Occupational Therapy, Rehabilitation Sciences**

18  
19 **Institute, Faculty of Medicine, University of Toronto**

20  
21 **160-500 University Ave.**

22  
23  
24 **Toronto, ON M5G 1V7 Canada**

25  
26 **416-978-2041 (office)**

27  
28 **Jill.cameron@utoronto.ca**

29  
30 **Affiliate Scientist, UHN-Toronto Rehabilitation Institute**

31  
32 **Twitter: @caregiving\_UofT**

33  
34  
35  
36  
37  
38 **Funding:** This work was supported by a Ministry of Research and Innovation Early

39  
40  
41  
42  
43  
44  
45  
46  
47  
48  
49  
50  
51  
52  
53  
54  
55  
56  
57  
58  
59  
60  
61  
62  
63  
64  
65  
66  
67  
68  
69  
70  
71  
72  
73  
74  
75  
76  
77  
78  
79  
80  
81  
82  
83  
84  
85  
86  
87  
88  
89  
90  
91  
92  
93  
94  
95  
96  
97  
98  
99  
100  
101  
102  
103  
104  
105  
106  
107  
108  
109  
110  
111  
112  
113  
114  
115  
116  
117  
118  
119  
120  
121  
122  
123  
124  
125  
126  
127  
128  
129  
130  
131  
132  
133  
134  
135  
136  
137  
138  
139  
140  
141  
142  
143  
144  
145  
146  
147  
148  
149  
150  
151  
152  
153  
154  
155  
156  
157  
158  
159  
160  
161  
162  
163  
164  
165  
166  
167  
168  
169  
170  
171  
172  
173  
174  
175  
176  
177  
178  
179  
180  
181  
182  
183  
184  
185  
186  
187  
188  
189  
190  
191  
192  
193  
194  
195  
196  
197  
198  
199  
200  
201  
202  
203  
204  
205  
206  
207  
208  
209  
210  
211  
212  
213  
214  
215  
216  
217  
218  
219  
220  
221  
222  
223  
224  
225  
226  
227  
228  
229  
230  
231  
232  
233  
234  
235  
236  
237  
238  
239  
240  
241  
242  
243  
244  
245  
246  
247  
248  
249  
250  
251  
252  
253  
254  
255  
256  
257  
258  
259  
260  
261  
262  
263  
264  
265  
266  
267  
268  
269  
270  
271  
272  
273  
274  
275  
276  
277  
278  
279  
280  
281  
282  
283  
284  
285  
286  
287  
288  
289  
290  
291  
292  
293  
294  
295  
296  
297  
298  
299  
300  
301  
302  
303  
304  
305  
306  
307  
308  
309  
310  
311  
312  
313  
314  
315  
316  
317  
318  
319  
320  
321  
322  
323  
324  
325  
326  
327  
328  
329  
330  
331  
332  
333  
334  
335  
336  
337  
338  
339  
340  
341  
342  
343  
344  
345  
346  
347  
348  
349  
350  
351  
352  
353  
354  
355  
356  
357  
358  
359  
360  
361  
362  
363  
364  
365  
366  
367  
368  
369  
370  
371  
372  
373  
374  
375  
376  
377  
378  
379  
380  
381  
382  
383  
384  
385  
386  
387  
388  
389  
390  
391  
392  
393  
394  
395  
396  
397  
398  
399  
400  
401  
402  
403  
404  
405  
406  
407  
408  
409  
410  
411  
412  
413  
414  
415  
416  
417  
418  
419  
420  
421  
422  
423  
424  
425  
426  
427  
428  
429  
430  
431  
432  
433  
434  
435  
436  
437  
438  
439  
440  
441  
442  
443  
444  
445  
446  
447  
448  
449  
450  
451  
452  
453  
454  
455  
456  
457  
458  
459  
460  
461  
462  
463  
464  
465  
466  
467  
468  
469  
470  
471  
472  
473  
474  
475  
476  
477  
478  
479  
480  
481  
482  
483  
484  
485  
486  
487  
488  
489  
490  
491  
492  
493  
494  
495  
496  
497  
498  
499  
500  
501  
502  
503  
504  
505  
506  
507  
508  
509  
510  
511  
512  
513  
514  
515  
516  
517  
518  
519  
520  
521  
522  
523  
524  
525  
526  
527  
528  
529  
530  
531  
532  
533  
534  
535  
536  
537  
538  
539  
540  
541  
542  
543  
544  
545  
546  
547  
548  
549  
550  
551  
552  
553  
554  
555  
556  
557  
558  
559  
560  
561  
562  
563  
564  
565  
566  
567  
568  
569  
570  
571  
572  
573  
574  
575  
576  
577  
578  
579  
580  
581  
582  
583  
584  
585  
586  
587  
588  
589  
590  
591  
592  
593  
594  
595  
596  
597  
598  
599  
600  
601  
602  
603  
604  
605  
606  
607  
608  
609  
610  
611  
612  
613  
614  
615  
616  
617  
618  
619  
620  
621  
622  
623  
624  
625  
626  
627  
628  
629  
630  
631  
632  
633  
634  
635  
636  
637  
638  
639  
640  
641  
642  
643  
644  
645  
646  
647  
648  
649  
650  
651  
652  
653  
654  
655  
656  
657  
658  
659  
660  
661  
662  
663  
664  
665  
666  
667  
668  
669  
670  
671  
672  
673  
674  
675  
676  
677  
678  
679  
680  
681  
682  
683  
684  
685  
686  
687  
688  
689  
690  
691  
692  
693  
694  
695  
696  
697  
698  
699  
700  
701  
702  
703  
704  
705  
706  
707  
708  
709  
710  
711  
712  
713  
714  
715  
716  
717  
718  
719  
720  
721  
722  
723  
724  
725  
726  
727  
728  
729  
730  
731  
732  
733  
734  
735  
736  
737  
738  
739  
740  
741  
742  
743  
744  
745  
746  
747  
748  
749  
750  
751  
752  
753  
754  
755  
756  
757  
758  
759  
760  
761  
762  
763  
764  
765  
766  
767  
768  
769  
770  
771  
772  
773  
774  
775  
776  
777  
778  
779  
780  
781  
782  
783  
784  
785  
786  
787  
788  
789  
790  
791  
792  
793  
794  
795  
796  
797  
798  
799  
800  
801  
802  
803  
804  
805  
806  
807  
808  
809  
810  
811  
812  
813  
814  
815  
816  
817  
818  
819  
820  
821  
822  
823  
824  
825  
826  
827  
828  
829  
830  
831  
832  
833  
834  
835  
836  
837  
838  
839  
840  
841  
842  
843  
844  
845  
846  
847  
848  
849  
850  
851  
852  
853  
854  
855  
856  
857  
858  
859  
860  
861  
862  
863  
864  
865  
866  
867  
868  
869  
870  
871  
872  
873  
874  
875  
876  
877  
878  
879  
880  
881  
882  
883  
884  
885  
886  
887  
888  
889  
890  
891  
892  
893  
894  
895  
896  
897  
898  
899  
900  
901  
902  
903  
904  
905  
906  
907  
908  
909  
910  
911  
912  
913  
914  
915  
916  
917  
918  
919  
920  
921  
922  
923  
924  
925  
926  
927  
928  
929  
930  
931  
932  
933  
934  
935  
936  
937  
938  
939  
940  
941  
942  
943  
944  
945  
946  
947  
948  
949  
950  
951  
952  
953  
954  
955  
956  
957  
958  
959  
960  
961  
962  
963  
964  
965  
966  
967  
968  
969  
970  
971  
972  
973  
974  
975  
976  
977  
978  
979  
980  
981  
982  
983  
984  
985  
986  
987  
988  
989  
990  
991  
992  
993  
994  
995  
996  
997  
998  
999  
1000

50  
51  
52  
53  
54  
55  
56  
57  
58  
59  
60  
61  
62  
63  
64  
65  
66  
67  
68  
69  
70  
71  
72  
73  
74  
75  
76  
77  
78  
79  
80  
81  
82  
83  
84  
85  
86  
87  
88  
89  
90  
91  
92  
93  
94  
95  
96  
97  
98  
99  
100  
101  
102  
103  
104  
105  
106  
107  
108  
109  
110  
111  
112  
113  
114  
115  
116  
117  
118  
119  
120  
121  
122  
123  
124  
125  
126  
127  
128  
129  
130  
131  
132  
133  
134  
135  
136  
137  
138  
139  
140  
141  
142  
143  
144  
145  
146  
147  
148  
149  
150  
151  
152  
153  
154  
155  
156  
157  
158  
159  
160  
161  
162  
163  
164  
165  
166  
167  
168  
169  
170  
171  
172  
173  
174  
175  
176  
177  
178  
179  
180  
181  
182  
183  
184  
185  
186  
187  
188  
189  
190  
191  
192  
193  
194  
195  
196  
197  
198  
199  
200  
201  
202  
203  
204  
205  
206  
207  
208  
209  
210  
211  
212  
213  
214  
215  
216  
217  
218  
219  
220  
221  
222  
223  
224  
225  
226  
227  
228  
229  
230  
231  
232  
233  
234  
235  
236  
237  
238  
239  
240  
241  
242  
243  
244  
245  
246  
247  
248  
249  
250  
251  
252  
253  
254  
255  
256  
257  
258  
259  
260  
261  
262  
263  
264  
265  
266  
267  
268  
269  
270  
271  
272  
273  
274  
275  
276  
277  
278  
279  
280  
281  
282  
283  
284  
285  
286  
287  
288  
289  
290  
291  
292  
293  
294  
295  
296  
297  
298  
299  
300  
301  
302  
303  
304  
305  
306  
307  
308  
309  
310  
311  
312  
313  
314  
315  
316  
317  
318  
319  
320  
321  
322  
323  
324  
325  
326  
327  
328  
329  
330  
331  
332  
333  
334  
335  
336  
337  
338  
339  
340  
341  
342  
343  
344  
345  
346  
347  
348  
349  
350  
351  
352  
353  
354  
355  
356  
357  
358  
359  
360  
361  
362  
363  
364  
365  
366  
367  
368  
369  
370  
371  
372  
373  
374  
375  
376  
377  
378  
379  
380  
381  
382  
383  
384  
385  
386  
387  
388  
389  
390  
391  
392  
393  
394  
395  
396  
397  
398  
399  
400  
401  
402  
403  
404  
405  
406  
407  
408  
409  
410  
411  
412  
413  
414  
415  
416  
417  
418  
419  
420  
421  
422  
423  
424  
425  
426  
427  
428  
429  
430  
431  
432  
433  
434  
435  
436  
437  
438  
439  
440  
441  
442  
443  
444  
445  
446  
447  
448  
449  
450  
451  
452  
453  
454  
455  
456  
457  
458  
459  
460  
461  
462  
463  
464  
465  
466  
467  
468  
469  
470  
471  
472  
473  
474  
475  
476  
477  
478  
479  
480  
481  
482  
483  
484  
485  
486  
487  
488  
489  
490  
491  
492  
493  
494  
495  
496  
497  
498  
499  
500  
501  
502  
503  
504  
505  
506  
507  
508  
509  
510  
511  
512  
513  
514  
515  
516  
517  
518  
519  
520  
521  
522  
523  
524  
525  
526  
527  
528  
529  
530  
531  
532  
533  
534  
535  
536  
537  
538  
539  
540  
541  
542  
543  
544  
545  
546  
547  
548  
549  
550  
551  
552  
553  
554  
555  
556  
557  
558  
559  
560  
561  
562  
563  
564  
565  
566  
567  
568  
569  
570  
571  
572  
573  
574  
575  
576  
577  
578  
579  
580  
581  
582  
583  
584  
585  
586  
587  
588  
589  
590  
591  
592  
593  
594  
595  
596  
597  
598  
599  
600  
601  
602  
603  
604  
605  
606  
607  
608  
609  
610  
611  
612  
613  
614  
615  
616  
617  
618  
619  
620  
621  
622  
623  
624  
625  
626  
627  
628  
629  
630  
631  
632  
633  
634  
635  
636  
637  
638  
639  
640  
641  
642  
643  
644  
645  
646  
647  
648  
649  
650  
651  
652  
653  
654  
655  
656  
657  
658  
659  
660  
661  
662  
663  
664  
665  
666  
667  
668  
669  
670  
671  
672  
673  
674  
675  
676  
677  
678  
679  
680  
681  
682  
683  
684  
685  
686  
687  
688  
689  
690  
691  
692  
693  
694  
695  
696  
697  
698  
699  
700  
701  
702  
703  
704  
705  
706  
707  
708  
709  
710  
711  
712  
713  
714  
715  
716  
717  
718  
719  
720  
721  
722  
723  
724  
725  
726  
727  
728  
729  
730  
731  
732  
733  
734  
735  
736  
737  
738  
739  
740  
741  
742  
743  
744  
745  
746  
747  
748  
749  
750  
751  
752  
753  
754  
755  
756  
757  
758  
759  
760  
761  
762  
763  
764  
765  
766  
767  
768  
769  
770  
771  
772  
773  
774  
775  
776  
777  
778  
779  
780  
781  
782  
783  
784  
785  
786  
787  
788  
789  
790  
791  
792  
793  
794  
795  
796  
797  
798  
799  
800  
801  
802  
803  
804  
805  
806  
807  
808  
809  
810  
811  
812  
813  
814  
815  
816  
817  
818  
819  
820  
821  
822  
823  
824  
825  
826  
827  
828  
829  
830  
831  
832  
833  
834  
835  
836  
837  
838  
839  
840  
841  
842  
843  
844  
845  
846  
847  
848  
849  
850  
851  
852  
853  
854  
855  
856  
857  
858  
859  
860  
861  
862  
863  
864  
865  
866  
867  
868  
869  
870  
871  
872  
873  
874  
875  
876  
877  
878  
879  
880  
881  
882  
883  
884  
885  
886  
887  
888  
889  
890  
891  
892  
893  
894  
895  
896  
897  
898  
899  
900  
901  
902  
903  
904  
905  
906  
907  
908  
909  
910  
911  
912  
913  
914  
915  
916  
917  
918  
919  
920  
921  
922  
923  
924  
925  
926  
927  
928  
929  
930  
931  
932  
933  
934  
935  
936  
937  
938  
939  
940  
941  
942  
943  
944  
945  
946  
947  
948  
949  
950  
951  
952  
953  
954  
955  
956  
957  
958  
959  
960  
961  
962  
963  
964  
965  
966  
967  
968  
969  
970  
971  
972  
973  
974  
975  
976  
977  
978  
979  
980  
981  
982  
983  
984  
985  
986  
987  
988  
989  
990  
991  
992  
993  
994  
995  
996  
997  
998  
999  
1000

50  
51 **Word Count: 2541**

52  
53 **Tables: 2**

## Abstract

**Objective:** To qualitatively explore factors affecting implementation of caregiver support programs in health care institutions in a regional stroke system.

**Design:** A qualitative descriptive study with the Ontario Stroke System (OSS) was conducted. Data were collected through focus groups and in-depth interviews. Transcripts were coded and analyzed using inductive thematic analysis.

**Setting:** Regional Stroke System, Ontario, Canada.

**Participants:** OSS stakeholders including medical directors, executives, program directors, education coordinators, rehabilitation and community and long-term care specialists, primary care leaders, and health care professionals.

**Intervention:** Not applicable.

**Main Outcome Measures:** Data collection explored perceptions of the need for caregiver support programs and factors that may affect their implementation.

**Results:** Four focus groups (n=43) and 29 interviews were completed. Analyses identified themes related to: 1) evidence that a caregiver program will improve health and health system outcomes; 2) personnel requirements; 3) barriers associated with current billing and referral processes; and 4) integration with current practice and existing workflow processes.

**Conclusions:** Implementation strategies to adopt caregiver programs into clinical practice should incorporate evidence and consider personnel and existing workflow processes.

**Keywords:** caregivers, stroke, organizations, qualitative research

**Abbreviations:**

OSS – Ontario Stroke System

FG – Focus Group

HCP – Health Care Professionals

MD – Medical Directors

RE – Regional Health Executives

PL – Primary Care Leaders

PRISMA – Program of Research to Integrate the Services for the Maintenance of Autonomy

ADLs – Activities of Daily Living



## Article Summary

### Strengths and Limitations of this study

- Our study used in-depth qualitative methods to explore organizational considerations for implementing caregiver programs in a regional stroke system.
- Our study included 72 participants reflecting key stakeholder groups responsible for supporting caregivers and implementing caregiver programs within institutions.
- We did not systematically obtain data related to years of experience in specific roles.
- Additional stakeholder groups (e.g., hospital managers) could have provided additional perspectives on caregiver program implementation.
- More in-depth probing of the specific challenges experienced in rural areas would have expanded our findings.

## Introduction

Family caregivers play a central role in the recovery, rehabilitation, and community re-integration of individuals who experience a stroke. Numerous studies have documented the negative impact providing care can have on caregiver health and wellbeing (1, 2). Previous literature suggest that 30-33% of caregivers experience depression (3). Taking on the caregiver role can also impact other aspects of a caregiver's life, including leisure, relationships, and work. Relatives who assumed the caregiver role had increased responsibilities, decreased leisure activities and negative changes in their relationships, and the impact on their lives can still be present after a year post-stroke (4). A study conducted in the United States found that the indirect costs associated with caregiving (e.g., traveling time, out-of-pocket expenses) amounted to \$5,669 per caregiver per year, and costs of total lost productivity amounted to more than \$10,000 per year per employed caregiver (5). Taken together, the caregiver role affects many aspects of a caregiver's life and education and support has the potential to enhance their abilities to take on and sustain this important role.

Previous literature recommends the use of multi-component interventions (6) that cross the care continuum (7, 8) to meet caregivers' needs for support. Multicomponent interventions include at least two of the following: information provision (e.g., community resources), emotional support and counseling (e.g., support groups, professional support) and skills training (physical care, problem solving) (6). For example, the 'Timing It Right' Family Stroke Family Support program is a multicomponent intervention that is delivered by a health care professional (stroke support person), who meets with the caregiver in-person in acute care and then follows up with six monthly telephone meetings to discuss caregiver's support needs and potential strategies to meet

1  
2  
3 these needs (7, 8). However, caregivers are not benefiting from these programs, as they are not  
4 being incorporated into standard clinical practice (9, 10). Research from the United Kingdom  
5 identified program and system level factors that limited the implementation of a stroke caregiver  
6 program into clinical practice (11, 12). Participants reported lack of time and individuals  
7 responsible for ensuring implementation as limiting factors.  
8  
9

10  
11  
12  
13  
14  
15 Caregiver program implementation has been studied in the context of dementia caregiving.  
16  
17 Although there are more than 200 efficacious dementia caregiver programs, only 6 have been  
18 integrated into practice (13). The need to identify contextual factors that may influence  
19 implementation has emerged as an emerging research field and an important step towards  
20 effective integration into practice (13). Previous studies undertook process evaluations during  
21 caregiver program implementation (e.g., (11, 12, 14)). However, the current study aimed to  
22 identify factors that may influence implementation in real-world settings prior to developing or  
23 testing an implementation strategy (15). Our research to date with the Ontario Stroke System  
24 (OSS) (16, 17) has indicated a need to understand implementation of caregiver programs within  
25 institutions. Therefore, the objective of this qualitative descriptive study was to examine program  
26 level factors (i.e., within institutions) that influence local implementation of caregiver programs  
27 in the context of a regional stroke system. For the purposes of this study, a caregiver education  
28 and support program was defined as a structured, time-limited intervention with a basic protocol  
29 and program materials. A program consists of one or more of the following: education, training  
30 and support.  
31  
32  
33  
34  
35  
36  
37  
38  
39  
40  
41  
42  
43  
44  
45  
46  
47  
48  
49  
50  
51  
52  
53  
54  
55  
56  
57  
58  
59  
60

## Methods

### Design

We conducted a qualitative descriptive study (18) and used the SRQR reporting guidelines (19). A qualitative approach is used when the purpose is to understand a specific phenomenon for which there has been limited research and the important variables to explore are unclear (20). There are no previous studies that have examined the implementation of caregiver education and support in standard clinical practice within the Canadian context. Specifically, a qualitative descriptive study design is particularly suited when producing a comprehensive description of participant perceptions of a specific phenomenon because data analysis and interpretation stays close to the data and participant perceptions are considered to be accurate and truthful reflections of the reality of the phenomenon (i.e., caregiver program implementation) (18). Participants were recruited from the OSS – regional system of stroke care in the province of Ontario. The OSS is publicly funded, includes 11 geographical regions, and provides specialized stroke care across the continuum. Each region includes a Regional Stroke Centre or Enhanced District Stroke Centre, community hospitals, rehabilitation hospitals, community-based providers and pre-hospital providers (21). Some of the regions are large encompassing rural areas and some are small and urban. There are 9 Regional Stroke Centres, 2 Enhanced District Stroke Centres, 16 District Stroke Centres, and 24 secondary prevention clinics (21). Institutional ethics boards, including the University of Toronto Research Ethics Board, approved the study. All participants provided written consent. This study was situated in the Knowledge-to-Action Framework's (22) barrier assessment step to identify facilitators and barriers in the local context. The Consolidated Framework for Implementation Research (23) informed data collection.

## **Patient and Public Involvement**

Patients and the public were not involved in the design of this research. Participants, as described below, were involved in this research through in-depth interviews and focus groups where they contributed their thoughts about caregivers and program implementation. Findings have been presented at local and national stroke conferences which is commonly attended by many participants and they will receive copies of publications.

## **Participants**

Participants were recruited from the 11 OSS regions including: Program Directors, Rehabilitation Specialists, Community and Long-Term Care Specialists, Education Coordinators, Medical Directors, and health care professionals providing stroke care in acute, rehabilitation, and community settings, and from the broader health care system including regional health executives, and primary care leaders. Regional Rehabilitation Specialists, Professional Education Coordinators, Community and Long-Term Care Specialists, and Regional/District Program Directors were invited by the corresponding author via email to participate in a focus group as part of regularly scheduled group meetings. Regional Medical Directors, health executives, and primary care leaders were invited by the corresponding author via email to participate in an interview. OSS Education Coordinators assisted with recruitment of health care professionals by emailing the study invitation to attendees of their education sessions. The primary author then coordinated and conducted all interviews and focus groups.

None of the members of the research team had any formal relationships with the participants.

The corresponding author has shared their research with members of the Ontario Stroke System through invited presentations and workshops.

## Data Collection

Participants were asked to discuss: 1) perceptions of the availability, importance, and effectiveness of caregiver programs; 2) current practices related to caregiver education and support; and 3) program level implementation considerations. The focus group and interview questions incorporated the domains of the Consolidated Framework for Implementation Research (CFIR) (23) to explore how individual and institution-level factors influence caregiver program implementation (see supplemental appendix). For example, individual level factors such as understanding of caregiver needs, the institution's ability to address caregiver needs, and the evidence base for caregiver programs can all influence program implementation (23).

Participants were asked to reflect on all caregiver programs in general and then more specifically on caregiver programs that cross care environments using the Timing It Right Stroke Family Support Program (7, 8) as an example. Focus groups were conducted in person at the local Heart and Stroke Foundation office and interviews were conducted by telephone. The primary author collected all data and is an occupational therapist and doctoral candidate with training in qualitative interviewing. Data collection took place over the course of four months and ended when data saturation was reached. Qualitative, semi-structured interviews and focus groups were audio-recorded, transcribed verbatim, reviewed for accuracy, and de-identified.

## Data Analysis

Qualitative thematic analysis is commonly used to analyze data in qualitative descriptive studies (18). Data were analyzed using inductive thematic analysis (24) and facilitated using NVivo (25). The first author coded all of the data and all authors reviewed the data and contributed to theme generation. Reflexive notes and field notes were taken throughout data

collection and analysis to ensure the dependability and confirmability of the findings (18). To maximize the credibility of the findings, all authors reviewed data and contributed to theme generation (26).

## Results

Four focus groups (n=43) and 29 individual interviews yielded 72 participants (see tables 1 and 2). Four themes related to: 1) need for evidence that a caregiver program will improve patient and caregiver health and health system outcomes after “real world” implementation; 2) personnel requirements; 3) barriers associated with current billing and referral processes; and 4) integration with current practice and workflow processes. Participant quotations from focus groups (FG) and interviews with health care professionals (HCP), medical directors (MD), regional health executives (RE), and primary care leaders (PL) are identified by number.

**Table 1: Professional role of participants:** A summary of study participants’ professional roles.

| Participant Group                   | Number (%) of Participants (n=72)* |
|-------------------------------------|------------------------------------|
| Regional/District Program Directors | 19 (26%)                           |
| Community and Long-Term Care        | 7 (10%)                            |
| Regional Education Coordinators     | 7 (10%)                            |
| Regional Rehabilitation Specialists | 11 (15%)                           |
| Regional Medical Directors (INT)    | 2 (3%)                             |
| Health Region Executives (INT)      | 4 (6%)                             |

1  
2  
3  
4  
5  
6  
7  
8  
9  
10  
11  
12  
13  
14  
15  
16  
17  
18  
19  
20  
21  
22  
23  
24  
25  
26  
27  
28  
29  
30  
31  
32  
33  
34  
35  
36  
37  
38  
39  
40  
41  
42  
43  
44  
45  
46  
47  
48  
49  
50  
51  
52  
53  
54  
55  
56  
57  
58  
59  
60

| <b>Participant Group</b>         | <b>Number (%) of Participants (n=72)*</b> |
|----------------------------------|-------------------------------------------|
| Health Region Primary Care Leads | 4 (6%)                                    |
| Health Care Professionals (INT)  | 19 (26%)                                  |

Abbreviations: FG, focus group; INT, interview.

\*One participant had a dual role.

For peer review only



**Table 2: Health Care Professionals by Sector and Occupation:** A summary of study participants' clinical sector and profession.

| <b>Health Care Professionals by Sector and Occupation</b> |                                          |
|-----------------------------------------------------------|------------------------------------------|
| <b>Sector</b>                                             | <b>Number (%) of Participants (N=19)</b> |
| Acute                                                     | 5 (26%)                                  |
| Rehabilitation                                            | 7 (37%)                                  |
| Community                                                 | 6 (32%)                                  |
| Private                                                   | 1 (5%)                                   |
| <b>Profession</b>                                         |                                          |
| Occupational Therapist                                    | 5 (26%)                                  |
| Physical Therapist                                        | 4 (21%)                                  |
| Speech Language Pathologist                               | 3 (16%)                                  |
| Physiatrist/Recreational Therapist/Stroke Care Navigator  | 3 (16%)                                  |
| Registered Nurse                                          | 2 (11%)                                  |
| Social Worker                                             | 2 (11%)                                  |

**Theme 1: Need for evidence that a caregiver program will improve patient and caregiver health and health system outcomes after “real world” implementation**

Participants discussed the role of evidence, including program evaluation, to support funding, implementation, and sustainability of caregiver programs. Participants suggest

1  
2  
3 stakeholders differ in their preferences for process (e.g., program attendance) or outcomes (e.g.,  
4 health and health system outcomes) data. For example, some prefer numerical data to support  
5 implementation (e.g., program attendance) while others are looking for success stories (e.g.,  
6 patient stories). The following quotation describes the roles of pilot testing and program  
7 evaluation to sustain implementation in practice:  
8  
9  
10  
11  
12  
13

14 But the point I'm trying to get across is that...the organization if they see...there's  
15 research to back up the effectiveness of it [caregiver program]...then they'll pilot it...  
16 to see if it's working, and then...upper management...they'll look at the number of  
17 people who are taking advantage of the programs cause it all comes down to numbers  
18 for organizations, right. And...if it is working right then that pilot program can  
19 become...a regular program that the hospital runs and incorporates as a part of their  
20 budget. (HCP 19)  
21  
22  
23  
24  
25  
26  
27  
28  
29

## 30 **Theme 2: Personnel Requirements**

31  
32 Many participants agreed that existing team members would not be able to assume this  
33 added responsibility so a new role was needed. In terms of creating a new role, three  
34 considerations were discussed: 1) similarity with existing roles; 2) integration into a community-  
35 based navigator role; and 3) integration into health care teams in acute and rehabilitation settings.  
36 A few participants highlighted the overlap with existing roles (e.g., community care case  
37 managers) so this role would need to be clearly defined:  
38  
39  
40  
41  
42  
43  
44  
45

46 ...defining whose role is what and again who's responsible for what, because if you're  
47 doing a quarter of the discharge planner's job and you're doing thirty percent of the  
48 family doctor's job...there's too much duplication in the hospital and in the health care.  
49  
50  
51  
52  
53  
54 (HCP 15)  
55  
56  
57  
58  
59  
60

1  
2  
3 Some participants spoke about the navigator role in which an individual supports patients  
4 and families in the community. Perspectives differed as to the possibility of integrating caregiver  
5 support into this role as their availability and function varied by region: "...not every region has  
6 a navigator...and those that do they function very differently" (FG 3).  
7  
8  
9  
10  
11

12 Participants questioned the feasibility of having a position that crosses care environments  
13 because current practice does not include contact with patients and their caregivers after they  
14 leave the institution. While they indicated the desire for a single point of contact for caregiver  
15 support, they spoke about the challenge of determining funding sources and sustainability with  
16 current fiscal restraints. The following quotation raises the issue of funding and ownership for  
17 this role, particularly in cases where acute and rehabilitation care are separate institutions:  
18  
19  
20  
21  
22  
23  
24  
25

26 This acute person follows the patient through their rehab stay to community...how does  
27 that work when it's [rehab] a separate facility? Like the ownership ... that's why the  
28 idea of dedicated resources seems to be a good fit to overcome that barrier because if  
29 you think about it, if someone's being paid by [hospital A] to handle [hospital A]  
30 patients and...and they're off to another...that's what I'm thinking is a barrier for  
31 you... (FG 4)  
32  
33  
34  
35  
36  
37  
38  
39

40 The increasingly large caseload this single person would have to manage was also  
41 mentioned as a concern for the feasibility of this approach: "...just by the nature of the beast it's  
42 most likely that you're going to...need a few of these individuals...because their caseload is  
43 going to just get bigger and bigger..." (FG 4). Instead, some participants suggested that caregiver  
44 support be organized by care environment with health care teams picking up the education where  
45 the last team finished. The following quotation provides an example: "I can see it working  
46 as...the stroke nurse's role to take it from point A to point B and then...it would be the social  
47  
48  
49  
50  
51  
52  
53  
54  
55

1  
2  
3 worker and rehab's role to be from this section to this section and then it would be the  
4  
5 community navigator or the outpatient OT...to be taken to the next stage..." (FG 3).  
6

7  
8 In addition, some participants felt that it may be more likely to be funded if it was used  
9  
10 region-wide. However, in geographically larger stroke regions, it would be very challenging for  
11  
12 one individual to cover the entire region:  
13

14  
15 And the individual has to be a regional resource versus organizational. So they can't  
16  
17 necessarily belong to a specific hospital but they have to have the capacity to cover a  
18  
19 region and be flexible in that...which is a barrier up north. (FG 2)  
20

21  
22 Participants had different perspectives regarding the role of health care professionals in  
23  
24 providing caregiver support. This individual would need to be knowledgeable about acute care,  
25  
26 rehabilitation, and community care and to stay up-to-date with community resources. He or she  
27  
28 would have counseling skills and a good understanding of each of the disciplines on the health  
29  
30 care team. Some participants provided examples of specific health care professionals they  
31  
32 perceived to be most appropriate for this role, including occupational therapists, social workers,  
33  
34 nurses, and other allied health professionals.  
35  
36

37  
38 Participants questioned the use of trained volunteers or non-health care professionals.  
39  
40 Some of the regional health executives discussed the limited availability and high costs of health  
41  
42 care professionals as the main reasons to consider volunteers. The following quotation highlights  
43  
44 this point: "So it may be a costly model if the person is a health care professional. There may be  
45  
46 other models where you use peers, somebody who's had a similar experience or volunteers who  
47  
48 have been trained" (RE 4). However, there might be instances when the issues facing the  
49  
50 families are predominantly medical in nature, and these personnel may not be able to address  
51  
52 such issues:  
53  
54  
55  
56

1  
2  
3 ...the challenge would be and we've seen it with community navigators when it's an  
4 orphan patient and we have a community navigator following them but all their issues  
5 are medical...that community navigator is not equipped to provide advice or to plan  
6 any intervention other than to say go to a walk in clinic or et cetera. And that then it  
7 becomes a challenge for both parties. (FG 1)  
8  
9  
10  
11  
12  
13

### 14 **Theme 3: Barriers associated with current billing and referral processes**

15  
16 Participants agreed that existing infrastructure should incorporate caregiver programs.  
17 However, participants identified several challenges. Health care professionals and Rehabilitation  
18 Specialists suggested that organizational referral criteria and government-funded health  
19 insurance precludes caregivers from being formal units of care. One participant explained that  
20 there are community-based activities that would be appropriate for the patient-caregiver dyad,  
21 but because the organization's mandate is to provide services to individuals with disabilities and  
22 there is no billing structure for services provided to caregivers, caregivers are not included. The  
23 following quotation demonstrates how the current billing structure and referral criteria hinder the  
24 provision of caregiver support within health care organizations:  
25  
26  
27  
28  
29  
30  
31  
32  
33  
34  
35  
36

37 Let's say we register the caregiver as a patient, then they need a chart. Then they need  
38 space in health records. Like then we have to track them that way...if the caregiver  
39 now becomes the patient then you need to refer them to mental health if that's the issue.  
40 Do you know what I mean...So whether or not our institution would adopt that would  
41 be really interesting to see. I doubt it...Cause then a cost comes in. (HCP 10)  
42  
43  
44  
45  
46  
47  
48

### 49 **Theme 4: Integration with current practice and existing workflow processes**

50  
51 Participants discussed four facilitators to the integration of caregiver support into current  
52 practice and existing workflow processes. Potential challenges were also discussed.  
53  
54  
55  
56  
57  
58  
59  
60

1  
2  
3 First, participants suggested the caregiver support role should become part of routine  
4 practice. This approach may overcome limited therapist time to provide support in both inpatient  
5 and community care.  
6  
7  
8  
9

10 Second, participants were concerned with incorporating caregiver support into patient  
11 charts. A few participants indicated that there are no places in patient charts to document the  
12 specific education provided. If education became required practice, the tendency might be to  
13 provide the support for the sake of checking off the box as opposed to paying attention to the  
14 content, timing, or the readiness of the caregiver to receive this information. The following  
15 quotation underscores the challenges with incorporating caregiver support into existing  
16 documentation, particularly when these programs cross care environments:  
17  
18  
19  
20  
21  
22  
23  
24  
25

26 ...so if there is a way to [tick off] have you done your section of [caregiver program]  
27 ...you would almost have to be embedded in documentation somehow too so that it is  
28 not missed and that would be hard because... once that patient is gone, so is their  
29 chart...you are not even supposed to go into the chart after... (FG 3)  
30  
31  
32  
33  
34

35 Third, participants emphasized communication between the individual providing  
36 caregiver support and the rest of the care team to ensure consistency and continuity in messaging  
37 to caregivers. This was noted as a challenge in community care because team members do not  
38 necessarily communicate with one another or know who else is working with the patient.  
39  
40  
41  
42  
43

44 Lastly, participants highlighted the importance of having a formalized and structured  
45 approach to guide implementation. This would require ready-made materials that can be adapted  
46 to local contexts, developing a clear referral and monitoring system, setting target user criteria,  
47 and establishing a mechanism for re-accessing caregivers if they initially decline the program.  
48  
49  
50  
51  
52  
53  
54 Participants suggested some health care professions would need education and tools to assess  
55  
56  
57  
58  
59  
60

1  
2  
3 caregivers' needs and provide appropriate supports. Training may also enhance soft skills as  
4  
5 many health care professionals may be more comfortable with the more technical aspects of their  
6  
7 clinical work.  
8  
9

## 10 **Discussion**

11  
12 The objective of this study was to identify factors that influence implementation of  
13  
14 caregiver programs within institutions. The four themes suggest that the availability of evidence  
15  
16 to support program outcomes, personnel requirements, and a supportive structure including  
17  
18 billing, workflow and resources are important for caregiver program implementation.  
19  
20

21  
22 As we aim to support transitions across the care continuum (7, 8, 27, 28), our findings  
23  
24 suggest one potential approach to implementing a program that crosses care environments. This  
25  
26 would involve offering a program across care environments with health care teams picking up  
27  
28 the education where the last team finished. Caregivers, however, prefer having one individual  
29  
30 provide support across the care continuum (29). One possible solution to address these  
31  
32 differences in perspectives comes from the aging literature. Stroke care could adopt an integrated  
33  
34 service delivery model such as one proposed for the frail elderly. The PRISMA (Program of  
35  
36 Research to Integrate the Services for the Maintenance of Autonomy) model uses case managers  
37  
38 to coordinate and monitor the needs of frail elderly across care environments and has  
39  
40 demonstrated positive impacts on patient and caregiver health, and health care utilization (30,  
41  
42 31). The applicability of this service delivery model to stroke care warrants further consideration.  
43  
44 Participant responses indicated that various health care professionals would be suitable to  
45  
46 provide support to caregivers. One example is occupational therapists where previous literature  
47  
48 suggests that occupational therapists can serve an important role in addressing the needs of  
49  
50 caregivers (32). Occupational therapists are a core member of multi-disciplinary stroke teams  
51  
52  
53  
54  
55

1  
2  
3 and they contribute to caregiver training (e.g., teaching ADLs) (33, 34). Beyond training in  
4  
5 ADLs, occupational therapists' training in mental health and meaningful occupations prepares  
6  
7 them for addressing the psychosocial effects of caregiving (33). There is a need to address  
8  
9 caregivers' needs such that they are able to maintain both their own health and engagement in  
10  
11 valued activities and provide care for their loved ones (4). This previous research (4) and our  
12  
13 study findings highlight occupational therapists as a potential source of support for caregivers.  
14  
15

16  
17 Current billing structures and referral criteria preclude the provision of services to  
18  
19 caregivers in standard clinical practice. This suggests a need to expand organizational structures  
20  
21 for billing, referral and documentation to include caregiver support. As demonstrated in the  
22  
23 PRISMA model, information systems (e.g., computerized client chart that is available across  
24  
25 organizations) can be developed to overcome organizational structures (30). The integration of  
26  
27 caregivers into information systems can facilitate program implementation (12).  
28  
29  
30  
31  
32

### 33 **Strengths and Limitations**

34  
35 Our study used in-depth qualitative methods to explore organizational considerations for  
36  
37 implementing caregiver programs in a regional stroke system. Our study included 72 participants  
38  
39 reflecting key stakeholder groups responsible for supporting caregivers and implementing  
40  
41 caregiver programs within institutions. We did not systematically obtain data related to years of  
42  
43 experience in specific roles. Additional stakeholder groups (e.g., hospital managers) could have  
44  
45 provided additional perspectives on caregiver program implementation. More in-depth probing  
46  
47 of the specific challenges experienced in rural areas would have expanded our findings.  
48  
49  
50

51 In summary, our study was one of the first to examine implementation of caregiver  
52  
53 programs within a regional stroke system. It adds to the existing literature by delineating  
54  
55



1  
2  
3 implementation considerations and highlighting the potential role for occupational therapists and  
4  
5 other health care professionals as providers of caregiver support.  
6  
7  
8  
9  
10  
11  
12  
13  
14  
15  
16  
17  
18  
19  
20  
21  
22  
23  
24  
25  
26  
27  
28  
29  
30  
31  
32  
33  
34  
35  
36  
37  
38  
39  
40  
41  
42  
43  
44  
45  
46  
47  
48  
49  
50  
51  
52  
53  
54  
55  
56  
57  
58  
59  
60

For peer review only

### **Conflict of Interest**

Authors have no conflicts of interest to declare.

### **Author Contributions**

VT contributed to the project conceptualization and design, data acquisition and qualitative interviewing, coding and data analysis, theme generation, drafting and revising the manuscript.

SJ contributed to project conceptualization and design, qualitative data analysis, theme generation and revisions to the final manuscript.

NMS contributed to project conceptualization and design, qualitative data analysis, theme generation and revisions to the final manuscript.

JIC contributed to the project conceptualization and design, qualitative data analysis, theme generation, drafting and revising the manuscript.

### **Data Availability**

Data may be accessed by contacting the corresponding author.

## References

1. Rigby H, Gubitz G, Phillips S. A systematic review of caregiver burden following stroke. *Int J Stroke*. 2009;4(4):285-92.
2. Gaugler JE. The longitudinal ramifications of stroke caregiving: a systematic review. *REHABIL PSYCHOL*. 2010;55(2):108-25.
3. Berg A, Palomaki H, Lonnqvist J, Lehtihalmes M, Kaste M. Depression Among Caregivers of Stroke Survivors. *Stroke*. 2005;36(3):639-43.
4. Pellerin C, Rochette A, Racine E. Social participation of relatives post-stroke: the role of rehabilitation and related ethical issues. *Disabil Rehabil*. 2011;33(13-14):1055-64.
5. Ganapathy V, Graham GD, DiBonaventura MD, Gillard PJ, Goren A, Zorowitz RD. Caregiver burden, productivity loss, and indirect costs associated with caring for patients with poststroke spasticity. *Clin Interv Aging*. 2015;10:1793-802.
6. White cL, Cantu, A.G., Trevino, M.M. Interventions for caregivers of stroke survivors: An update of the evidence. *Clinical Nursing Studies*. 2015;3(3):9.
7. Cameron JI, Naglie G, Gignac MA, Bayley M, Warner G, Green T, et al. Randomized clinical trial of the timing it right stroke family support program: research protocol. *BMC Health Serv Res*. 2014;14:18.
8. Cameron JI, Naglie G, Green TL, Gignac MA, Bayley M, Huijbregts M, et al. A feasibility and pilot randomized controlled trial of the "Timing it Right Stroke Family Support Program". *Clin Rehabil*. 2014.
9. Rochette A, Korner-Bitensky N, Desrosiers J. Actual vs best practice for families post-stroke according to three rehabilitation disciplines. *J Rehabil Med*. 2007;39(7):513-9.
10. Rochette A, Racine E, Lefebvre H, Bastien J, Tellier M. Actual and ideal services in acute care and rehabilitation for relatives post-stroke from three perspectives: Relatives, stroke clients and health professionals. *J Rehabil Med*. 2014;46(1):16-22.
11. Clarke DJ, Hawkins R, Sadler E, Harding G, McKeivitt C, Godfrey M, et al. Introducing structured caregiver training in stroke care: findings from the TRACS process evaluation study. *BMJ Open*. 2014;4(4):e004473.
12. Clarke DJ, Godfrey M, Hawkins R, Sadler E, Harding G, Forster A, et al. Implementing a training intervention to support caregivers after stroke: a process evaluation examining the initiation and embedding of programme change. *Implement Sci*. 2013;8:96.
13. Gitlin LN, Marx K, Stanley IH, Hodgson N. Translating Evidence-Based Dementia Caregiving Interventions into Practice: State-of-the-Science and Next Steps. *Gerontologist*. 2015;55(2):210-26.
14. Paone D. Using RE-AIM to evaluate implementation of an evidence-based program: a case example from Minnesota. *J Gerontol Soc Work*. 2014;57(6-7):602-25.
15. Centers for Disease Control and Prevention & the Kimberly-Clark Corporation. Assuring Healthy Caregivers, a Public Health Approach to Translating Research into Practice: The RE-AIM Framework. Neenah, WI: Kimberly-Clark Corporation; 2008 Available from: [https://www.cdc.gov/aging/pdf/caregiving\\_monograph.pdf](https://www.cdc.gov/aging/pdf/caregiving_monograph.pdf).
16. Tseung V, Jaglal SB, Salbach NM, Cameron JI. Implementing Caregiver Support Programs in a Regional Stroke System. *Stroke*. 2019:STROKEAHA119026660.

17. Tseung V, Jaglal SB, Salbach NM, Yoshida K, Cameron JI. Key informants' perspectives on implementing caregiver programs in an organized system of stroke care. *Disabil Rehabil*. 2019;1-8.
18. Sandelowski M. What's in a name? Qualitative description revisited. *Res Nurs Health*. 2010;33(1):77-84.
19. O'Brien BC, Harris IB, Beckman TJ, Reed DA, Cook DA. Standards for reporting qualitative research: a synthesis of recommendations. *Acad Med*. 2014;89(9):1245-51.
20. Creswell JW. *Research Design: Qualitative, quantitative and mixed method approaches*. 2nd ed. Thousand Oaks, CA: Sage Publications Inc.; 2003 2003.
21. Lewis M, Trypuc J, Lindsay P, O'Callaghan C, Dishaw A. Has Ontario's Stroke System Really Made a Difference? *Healthcare Quarterly* 4; 20062006. p. 50-9.
22. Graham ID, Logan J, Harrison MB, Straus SE, Tetroe J, Caswell W, et al. Lost in knowledge translation: time for a map? *J Contin Educ Health Prof*. 2006;26(1):13-24.
23. Damschroder LJ, Aron DC, Keith RE, Kirsh SR, Alexander JA, Lowery JC. Fostering implementation of health services research findings into practice: a consolidated framework for advancing implementation science. *Implement Sci*. 2009;4:50.
24. Braun V, Clarke V. Using thematic analysis in psychology. *Qualitative Research in Psychology*. 2006;3(2):77-101.
25. NVivo qualitative data analysis software. 10.0 ed: QSR International Pty Ltd.; 2012.
26. McReynolds CJ, Koch LC, Rumrill PD, Jr. Speaking of research. *Qualitative research strategies in rehabilitation*. *WORK: A Journal of Prevention, Assessment & Rehabilitation*. 2001;16(1):57-65.
27. Cameron JI, Tsoi C, Marsella A. Optimizing stroke systems of care by enhancing transitions across care environments. *Stroke*. 2008;39(9):2637-43.
28. Cameron JI, O'Connell C, Foley N, Salter K, Booth R, Boyle R, et al. Canadian Stroke Best Practice Recommendations: Managing transitions of care following Stroke, Guidelines Update 2016. *Int J Stroke*. 2016;11(7):807-22.
29. Cameron JI, Naglie G, Silver FL, Gignac MA. Stroke family caregivers' support needs change across the care continuum: a qualitative study using the timing it right framework. *Disabil Rehabil*. 2013;35(4):315-24.
30. Hebert R, Durand PJ, Dubuc N, Tourigny A. PRISMA: a new model of integrated service delivery for the frail older people in Canada. *International Journal of Integrated Care*. 2003;3:1-8.
31. Hebert R, Raiche M, Dubois MF, Gueye NR, Dubuc N, Tousignant M, et al. Impact of PRISMA, a coordination-type integrated service delivery system for frail older people in Quebec (Canada): A quasi-experimental study. *J Gerontol B Psychol Sci Soc Sci*. 2010;65B(1):107-18.
32. Coutinho F, Hersch G, Davidson H. The Impact of Informal Caregiving on Occupational Therapy: Practice Review and Analysis. *Physical & Occupational Therapy In Geriatrics*. 2006;25(1):47-61.
33. Moghimi C. Issues in Caregiving: The Role of Occupational Therapy in Caregiver Training. *Topics in Geriatric Rehabilitation*. 2007;23(3):11.
34. Lawson S, Rowe, A., Meredith, Y.Y. . Survey of Stroke Caregiver Training provided by OT, PT, and SLP across Practice Settings. *Physical and Occupational Therapy*. 2015;33(4):36.

1  
2  
3  
4 Appendix I Interview/Focus Group Guides for Qualitative  
5  
6 Descriptive Study  
7  
8  
9  
10  
11  
12  
13  
14  
15  
16  
17  
18  
19  
20  
21  
22  
23  
24  
25  
26  
27  
28  
29  
30  
31  
32  
33  
34  
35  
36  
37  
38  
39  
40  
41  
42  
43  
44  
45  
46  
47  
48  
49  
50  
51  
52  
53  
54  
55  
56  
57  
58  
59  
60

For peer review only

## Focus Group Questions – Regional Community and Long-Term Care Specialists

1. What are your perceptions of caregiver education and support programs in terms of their utility, effectiveness and importance?
2. Please think about the programs you have implemented for patient education, caregiver education or caregiver support.
  - a. How did you go about implementing these programs?
  - b. What was your experience with implementing these programs?
  - c. If you have not implemented these types of programs, why?
3. The Timing It Right Stroke Family Support Program is an example of a structured caregiver program. The program uses a stroke support person (health care professional) to provide family caregivers with education and support in person and by telephone across care environments. The stroke support person meets with family caregivers in acute care to start providing support and to provide them with the program guide. The stroke support person will then conduct monthly follow-up telephone calls to address their support needs and to go over relevant information in the guide. The stroke support person follows family caregivers for approximately the first six months post stroke. This program aims to provide timely and tailored education and support to family caregivers. If you consider a structured caregiver support program like this one;
  - a. What factors would facilitate your region to implement this type of program?
  - b. What factors would hinder your region from implementing this type of program?
  - c. How could these factors be overcome?
4. What other thoughts do you have about meeting the needs of family caregivers?

### **Ending Question**

5. Do you have any final thoughts for us today?

Thank you for taking the time to participate and share your thoughts with us.

## Focus Group Questions – Regional Education Coordinators

1. In your region, what has been one key challenge to educating health care professionals to implement best practice recommendations in clinical practice?
2. Please think about the health care professional education initiatives you have implemented. How have these initiatives address the provision of patient and family education across the care continuum?
3. The Timing It Right Stroke Family Support Program is an example of a structured caregiver program. The program uses a stroke support person (health care professional) to provide family caregivers with education and support in person and by telephone across care environments. The stroke support person meets with family caregivers in acute care to start providing support and to provide them with the program guide. The stroke support person will then conduct monthly follow-up telephone calls to address their support needs and to go over relevant information in the guide. The stroke support person follows family caregivers for approximately the first six months post stroke. This program aims to provide timely and tailored education and support to family caregivers. If you consider a structured caregiver support program like this one; how could this type of program be incorporated into your regional education initiatives to facilitate its implementation into clinical practice?
4. What other thoughts do you have about meeting the needs of family caregivers?

### **Ending Question**

5. Do you have any final thoughts for us today?

Thank you for taking the time to participate and share your thoughts with us.

## Focus Group Questions – Regional/District Program Directors

1. What are your perceptions of caregiver education and support programs in terms of their utility, effectiveness and importance?
2. What programs have you implemented for patient education, caregiver education or caregiver support?
  - a. How did you go about implementing these programs?
  - b. What was your experience with implementing these programs?
  - c. If you have not implemented these types of programs, why?
3. The Timing It Right Stroke Family Support Program is an example of a structured caregiver program. The program uses a stroke support person (health care professional) to provide family caregivers with education and support in person and by telephone across care environments. The stroke support person meets with family caregivers in acute care, provides them with the program guide, and then conducts monthly follow-up telephone calls to address their support needs and to go over relevant information in the guide. The stroke support person follows family caregivers for approximately the first six months post stroke. This program aims to provide timely and tailored education and support to family caregivers. If you consider a structured caregiver support program like this one;
  - a. What factors would facilitate your region/district to implement this type of program?
  - b. What factors would hinder your region/district from implementing this type of program?
  - c. How could these factors be overcome?
4. What other thoughts do you have about meeting the needs of family caregivers?

### **Ending Question**

5. Do you have any final thoughts for us today?

Thank you for taking the time to participate and share your thoughts with us.



## Focus Group Questions – Regional Rehabilitation Specialists

1. What are your perceptions of caregiver education and support programs in terms of their utility, effectiveness and importance?
2. Please think about the programs you have implemented for patient education, caregiver education or caregiver support.
  - a. How did you go about implementing these programs?
  - b. What was your experience with implementing these programs?
  - c. If you have not implemented these types of programs, why?
3. The Timing It Right Stroke Family Support Program is an example of a structured caregiver program. The program uses a stroke support person (health care professional) to provide family caregivers with education and support in person and by telephone across care environments. The stroke support person meets with family caregivers in acute care to start providing support and to provide them with the program guide. The stroke support person will then conduct monthly follow-up telephone calls to address their support needs and to go over relevant information in the guide. The stroke support person follows family caregivers for approximately the first six months post stroke. This program aims to provide timely and tailored education and support to family caregivers. If you consider a structured caregiver support program like this one;
  - a. What factors would facilitate your region to implement this type of program?
  - b. What factors would hinder your region from implementing this type of program?
  - c. How could these factors be overcome?
4. What other thoughts do you have about meeting the needs of family caregivers?

### **Ending Question**

5. Do you have any final thoughts for us today?

Thank you for taking the time to participate and share your thoughts with us.

## Interview Guide – Health Care Professional Questions

1. Please tell us who you are, your professional training, and your role in the Ontario Stroke System.
2. Can you describe your involvement with family caregivers to stroke survivors?
3. What education and supports do family caregivers receive in your institution?
  - a. What is done well?
  - b. What could be done better?
  - c. What are your institution's future plans for offering programs to family caregivers?
4. What are your perceptions of caregiver education and support programs in terms of their utility and effectiveness?
  - a. Do you think your perceptions are in line with the perception of the health care organization you are currently in?
  - b. If not, in what ways are they different?
  - c. What factors would help your health care organization adopt family caregiver education and support programs into practice?
  - d. What factors are hindering your health care organization from adopting family caregiver education and support programs into practice?
  - e. What solutions would you propose to address these factors?
5. Our caregiver education and support program uses a stroke support person (health care professional) to provide family caregivers with education and support in person and by telephone across care environments; what factors would influence your health care organization to adopt this program?
  - a. What would be some of the barriers to adopting this program? What solutions would you propose to address these barriers?
6. What other thoughts do you have about meeting the needs of family caregivers?

### **Ending Questions**

7. If you could make one change to the health care system to make things better for family caregivers, what would that change be?

1  
2  
3 8. Do you have any final thoughts for me today?  
4  
5  
6  
7

8 Thank you for taking the time to participate and share your thoughts.  
9  
10  
11  
12  
13  
14  
15  
16  
17  
18  
19  
20  
21  
22  
23  
24  
25  
26  
27  
28  
29  
30  
31  
32  
33  
34  
35  
36  
37  
38  
39  
40  
41  
42  
43  
44  
45  
46  
47  
48  
49  
50  
51  
52  
53  
54  
55  
56  
57  
58  
59  
60

## Interview Guide – Local Health Integration Network Executive

1. Please tell me about your professional training and your role in the Local Health Integration Network
2. What are your perceptions of the need for, availability, and effectiveness of caregiver education and support programs?
3. What initiatives specifically targeting family caregivers are in place or in development? Can you describe them?
4. One model of a caregiver education and support program uses a stroke support person (health care professional) to provide family caregivers with education and support starting in acute care by meeting with them in person and then calling them monthly for approximately the first six months post stroke.
  - a. What could facilitate the implementation of this program into practice across your LHIN?
  - b. What could hinder the implementation of this program into practice across your LHIN?
  - c. What solutions would you propose to address these barriers?

### Ending Questions

5. What other thoughts do you have about meeting the needs of family caregivers?
6. If you could make one change to the health care system to make things better for family caregivers, what would that change be?
7. Do you have any final thoughts for me today?

Thank you for taking the time to participate and share your thoughts.

## Interview Guide – Local Health Integration Networks (LHIN) Primary Care Leads

1. How did the LHIN primary care leads group come about? Please describe your role as the primary care lead.
2. What initiatives specifically targeting family caregivers are in place or in development? Can you describe them?
3. How would caregiver education and support programs fit into primary care across your LHIN?
  - a. What factors would help the implementation of family caregiver education and support programs into practice?
  - b. What factors would hinder the implementation of family caregiver education and support programs into practice?
  - c. What solutions would you propose to address these factors?

### **Ending Questions**

4. What other thoughts do you have about meeting the needs of family caregivers?
5. If you could make one change to the health care system to make things better for family caregivers, what would that change be?
6. Do you have any final thoughts for me today?

Thank you for taking the time to participate and share your thoughts.

## Standards for Reporting Qualitative Research (SRQR)\*

<http://www.equator-network.org/reporting-guidelines/srqr/>

Page/line no(s).

### Title and abstract

|                                                                                                                                                                                                                                                              |        |
|--------------------------------------------------------------------------------------------------------------------------------------------------------------------------------------------------------------------------------------------------------------|--------|
| <p><b>Title</b> - Concise description of the nature and topic of the study Identifying the study as qualitative or indicating the approach (e.g., ethnography, grounded theory) or data collection methods (e.g., interview, focus group) is recommended</p> | Page 1 |
| <p><b>Abstract</b> - Summary of key elements of the study using the abstract format of the intended publication; typically includes background, purpose, methods, results, and conclusions</p>                                                               | Page 3 |

### Introduction

|                                                                                                                                                                     |          |
|---------------------------------------------------------------------------------------------------------------------------------------------------------------------|----------|
| <p><b>Problem formulation</b> - Description and significance of the problem/phenomenon studied; review of relevant theory and empirical work; problem statement</p> | Page 6-7 |
| <p><b>Purpose or research question</b> - Purpose of the study and specific objectives or questions</p>                                                              | Page 7   |

### Methods

|                                                                                                                                                                                                                                                                                                                                                                                                             |         |
|-------------------------------------------------------------------------------------------------------------------------------------------------------------------------------------------------------------------------------------------------------------------------------------------------------------------------------------------------------------------------------------------------------------|---------|
| <p><b>Qualitative approach and research paradigm</b> - Qualitative approach (e.g., ethnography, grounded theory, case study, phenomenology, narrative research) and guiding theory if appropriate; identifying the research paradigm (e.g., postpositivist, constructivist/ interpretivist) is also recommended; rationale**</p>                                                                            | Page 8  |
| <p><b>Researcher characteristics and reflexivity</b> - Researchers' characteristics that may influence the research, including personal attributes, qualifications/experience, relationship with participants, assumptions, and/or presuppositions; potential or actual interaction between researchers' characteristics and the research questions, approach, methods, results, and/or transferability</p> | n/a     |
| <p><b>Context</b> - Setting/site and salient contextual factors; rationale**</p>                                                                                                                                                                                                                                                                                                                            | Page 8  |
| <p><b>Sampling strategy</b> - How and why research participants, documents, or events were selected; criteria for deciding when no further sampling was necessary (e.g., sampling saturation); rationale**</p>                                                                                                                                                                                              | Page 9  |
| <p><b>Ethical issues pertaining to human subjects</b> - Documentation of approval by an appropriate ethics review board and participant consent, or explanation for lack thereof; other confidentiality and data security issues</p>                                                                                                                                                                        | Page 8  |
| <p><b>Data collection methods</b> - Types of data collected; details of data collection procedures including (as appropriate) start and stop dates of data collection and analysis, iterative process, triangulation of sources/methods, and modification of procedures in response to evolving study findings; rationale**</p>                                                                             | Page 10 |

|                       |                                                                                                                                                                                                                                                       |            |
|-----------------------|-------------------------------------------------------------------------------------------------------------------------------------------------------------------------------------------------------------------------------------------------------|------------|
| 1<br>2<br>3<br>4<br>5 | <b>Data collection instruments and technologies</b> - Description of instruments (e.g., interview guides, questionnaires) and devices (e.g., audio recorders) used for data collection; if/how the instrument(s) changed over the course of the study | Page 10    |
| 6<br>7<br>8           | <b>Units of study</b> - Number and relevant characteristics of participants, documents, or events included in the study; level of participation (could be reported in results)                                                                        | Page 9     |
| 9<br>10<br>11<br>12   | <b>Data processing</b> - Methods for processing data prior to and during analysis, including transcription, data entry, data management and security, verification of data integrity, data coding, and anonymization/de-identification of excerpts    | Page 10-11 |
| 13<br>14<br>15<br>16  | <b>Data analysis</b> - Process by which inferences, themes, etc., were identified and developed, including the researchers involved in data analysis; usually references a specific paradigm or approach; rationale**                                 | Page 10-11 |
| 17<br>18<br>19<br>20  | <b>Techniques to enhance trustworthiness</b> - Techniques to enhance trustworthiness and credibility of data analysis (e.g., member checking, audit trail, triangulation); rationale**                                                                | Page 10-11 |

### Results/findings

|                      |                                                                                                                                                                                                   |             |
|----------------------|---------------------------------------------------------------------------------------------------------------------------------------------------------------------------------------------------|-------------|
| 23<br>24<br>25<br>26 | <b>Synthesis and interpretation</b> - Main findings (e.g., interpretations, inferences, and themes); might include development of a theory or model, or integration with prior research or theory | Pages 11-19 |
| 27<br>28<br>29       | <b>Links to empirical data</b> - Evidence (e.g., quotes, field notes, text excerpts, photographs) to substantiate analytic findings                                                               | Pages 11-19 |

### Discussion

|                                        |                                                                                                                                                                                                                                                                                                                                                                                                             |             |
|----------------------------------------|-------------------------------------------------------------------------------------------------------------------------------------------------------------------------------------------------------------------------------------------------------------------------------------------------------------------------------------------------------------------------------------------------------------|-------------|
| 32<br>33<br>34<br>35<br>36<br>37<br>38 | <b>Integration with prior work, implications, transferability, and contribution(s) to the field</b> - Short summary of main findings; explanation of how findings and conclusions connect to, support, elaborate on, or challenge conclusions of earlier scholarship; discussion of scope of application/generalizability; identification of unique contribution(s) to scholarship in a discipline or field | Pages 19-21 |
| 39                                     | <b>Limitations</b> - Trustworthiness and limitations of findings                                                                                                                                                                                                                                                                                                                                            | Pages 20    |

### Other

|                |                                                                                                                                               |        |
|----------------|-----------------------------------------------------------------------------------------------------------------------------------------------|--------|
| 42<br>43<br>44 | <b>Conflicts of interest</b> - Potential sources of influence or perceived influence on study conduct and conclusions; how these were managed | n/a    |
| 45<br>46       | <b>Funding</b> - Sources of funding and other support; role of funders in data collection, interpretation, and reporting                      | Page 2 |

\*The authors created the SRQR by searching the literature to identify guidelines, reporting standards, and critical appraisal criteria for qualitative research; reviewing the reference lists of retrieved sources; and contacting experts to gain feedback. The SRQR aims to improve the transparency of all aspects of qualitative research by providing clear standards for reporting qualitative research.

1  
2  
3  
4  
5  
6  
7  
8  
9  
10  
11  
12  
13  
14  
15  
16  
17  
18  
19  
20  
21  
22  
23  
24  
25  
26  
27  
28  
29  
30  
31  
32  
33  
34  
35  
36  
37  
38  
39  
40  
41  
42  
43  
44  
45  
46  
47  
48  
49  
50  
51  
52  
53  
54  
55  
56  
57  
58  
59  
60

\*\*The rationale should briefly discuss the justification for choosing that theory, approach, method, or technique rather than other options available, the assumptions and limitations implicit in those choices, and how those choices influence study conclusions and transferability. As appropriate, the rationale for several items might be discussed together.

**Reference:**

O'Brien BC, Harris IB, Beckman TJ, Reed DA, Cook DA. **Standards for reporting qualitative research: a synthesis of recommendations.** *Academic Medicine*, Vol. 89, No. 9 / Sept 2014  
DOI: 10.1097/ACM.0000000000000388

For peer review only



# BMJ Open

## A Qualitative Study Assessing Organizational Readiness to Implement Caregiver Support Programs in Ontario, Canada

|                                 |                                                                                                                                                                                                                                                                                                                                                                                                                                                                        |
|---------------------------------|------------------------------------------------------------------------------------------------------------------------------------------------------------------------------------------------------------------------------------------------------------------------------------------------------------------------------------------------------------------------------------------------------------------------------------------------------------------------|
| Journal:                        | <i>BMJ Open</i>                                                                                                                                                                                                                                                                                                                                                                                                                                                        |
| Manuscript ID                   | bmjopen-2019-035559.R2                                                                                                                                                                                                                                                                                                                                                                                                                                                 |
| Article Type:                   | Original research                                                                                                                                                                                                                                                                                                                                                                                                                                                      |
| Date Submitted by the Author:   | 04-Apr-2020                                                                                                                                                                                                                                                                                                                                                                                                                                                            |
| Complete List of Authors:       | Tseung, Victrine; University of Toronto Faculty of Medicine, Rehabilitation Sciences Institute<br>Jaglal, Susan; University of Toronto Faculty of Medicine, Physical Therapy; Toronto Rehabilitation Institute<br>Salbach, Nancy; University of Toronto, Physical Therapy; Toronto Rehabilitation Institute<br>Cameron, Jill; University of Toronto Faculty of Medicine, Department of Occupational Science and Occupational Therapy; Toronto Rehabilitation Institute |
| <b>Primary Subject Heading</b>: | Rehabilitation medicine                                                                                                                                                                                                                                                                                                                                                                                                                                                |
| Secondary Subject Heading:      | Health services research                                                                                                                                                                                                                                                                                                                                                                                                                                               |
| Keywords:                       | Stroke < NEUROLOGY, QUALITATIVE RESEARCH, Organisation of health services < HEALTH SERVICES ADMINISTRATION & MANAGEMENT, REHABILITATION MEDICINE                                                                                                                                                                                                                                                                                                                       |
|                                 |                                                                                                                                                                                                                                                                                                                                                                                                                                                                        |

SCHOLARONE™  
Manuscripts



I, the Submitting Author has the right to grant and does grant on behalf of all authors of the Work (as defined in the below author licence), an exclusive licence and/or a non-exclusive licence for contributions from authors who are: i) UK Crown employees; ii) where BMJ has agreed a CC-BY licence shall apply, and/or iii) in accordance with the terms applicable for US Federal Government officers or employees acting as part of their official duties; on a worldwide, perpetual, irrevocable, royalty-free basis to BMJ Publishing Group Ltd ("BMJ") its licensees and where the relevant Journal is co-owned by BMJ to the co-owners of the Journal, to publish the Work in this journal and any other BMJ products and to exploit all rights, as set out in our [licence](#).

The Submitting Author accepts and understands that any supply made under these terms is made by BMJ to the Submitting Author unless you are acting as an employee on behalf of your employer or a postgraduate student of an affiliated institution which is paying any applicable article publishing charge ("APC") for Open Access articles. Where the Submitting Author wishes to make the Work available on an Open Access basis (and intends to pay the relevant APC), the terms of reuse of such Open Access shall be governed by a Creative Commons licence – details of these licences and which [Creative Commons](#) licence will apply to this Work are set out in our licence referred to above.

Other than as permitted in any relevant BMJ Author's Self Archiving Policies, I confirm this Work has not been accepted for publication elsewhere, is not being considered for publication elsewhere and does not duplicate material already published. I confirm all authors consent to publication of this Work and authorise the granting of this licence.

1  
2  
3  
4 **Running Head: Organizational Implementation of Caregiver Programs**  
5

6  
7 **Title: A Qualitative Study Assessing Organizational Readiness to Implement Caregiver**  
8 **Support Programs in Ontario, Canada.**  
9

10  
11  
12  
13 **Authors: Victrine Tseung, PhD, Susan B Jaglal, PhD, Nancy M Salbach, PhD, and Jill I**  
14 **Cameron, PhD**  
15

16  
17  
18  
19  
20  
21 **Victrine Tseung, PhD**  
22

23 **Rehabilitation Sciences Institute, Faculty of Medicine, University of Toronto**  
24

25 **160-500 University Ave**  
26

27 **Toronto, ON. Canada**  
28

29 **v.tseung@utoronto.ca**  
30  
31  
32  
33

34  
35 **Susan Jaglal, PhD FCAHS**  
36

37 **Toronto Rehabilitation Institute-UHN Chair**  
38

39 **Department of Physical Therapy, University of Toronto**  
40

41 **Associate Academic Director of Research TRI-UHN**  
42

43 **160-500 University Ave**  
44

45 **Toronto, ON M5G 1V7**  
46

47 **Susan.jaglal@utoronto.ca**  
48  
49

50  
51  
52  
53 **Nancy M. Salbach, PhD**  
54  
55  
56

1  
2  
3 **Department of Physical Therapy, University of Toronto**

4  
5 **160-500 University Avenue**

6  
7  
8 **Toronto, ON M5G 1V7 Canada**

9  
10 **Nancy.salbach@utoronto.ca**

11  
12  
13  
14 **Corresponding Author: Jill I. Cameron, PhD FAHA**

15  
16 **Department of Occupational Science and Occupational Therapy, Rehabilitation Sciences**

17  
18 **Institute, Faculty of Medicine, University of Toronto**

19  
20 **160-500 University Ave.**

21  
22 **Toronto, ON M5G 1V7 Canada**

23  
24 **416-978-2041 (office)**

25  
26 **Jill.cameron@utoronto.ca**

27  
28 **Affiliate Scientist, UHN-Toronto Rehabilitation Institute**

29  
30 **Twitter: @caregiving\_UofT**

31  
32  
33 **Funding:** This work was supported by a Ministry of Research and Innovation Early

34  
35  
36  
37  
38  
39  
40  
41  
42  
43  
44  
45  
46  
47  
48  
49  
50  
51  
52  
53  
54  
55  
56  
57  
58  
59  
60  
61  
62  
63  
64  
65  
66  
67  
68  
69  
70  
71  
72  
73  
74  
75  
76  
77  
78  
79  
80  
81  
82  
83  
84  
85  
86  
87  
88  
89  
90  
91  
92  
93  
94  
95  
96  
97  
98  
99  
100  
101  
102  
103  
104  
105  
106  
107  
108  
109  
110  
111  
112  
113  
114  
115  
116  
117  
118  
119  
120  
121  
122  
123  
124  
125  
126  
127  
128  
129  
130  
131  
132  
133  
134  
135  
136  
137  
138  
139  
140  
141  
142  
143  
144  
145  
146  
147  
148  
149  
150  
151  
152  
153  
154  
155  
156  
157  
158  
159  
160  
161  
162  
163  
164  
165  
166  
167  
168  
169  
170  
171  
172  
173  
174  
175  
176  
177  
178  
179  
180  
181  
182  
183  
184  
185  
186  
187  
188  
189  
190  
191  
192  
193  
194  
195  
196  
197  
198  
199  
200  
201  
202  
203  
204  
205  
206  
207  
208  
209  
210  
211  
212  
213  
214  
215  
216  
217  
218  
219  
220  
221  
222  
223  
224  
225  
226  
227  
228  
229  
230  
231  
232  
233  
234  
235  
236  
237  
238  
239  
240  
241  
242  
243  
244  
245  
246  
247  
248  
249  
250  
251  
252  
253  
254  
255  
256  
257  
258  
259  
260  
261  
262  
263  
264  
265  
266  
267  
268  
269  
270  
271  
272  
273  
274  
275  
276  
277  
278  
279  
280  
281  
282  
283  
284  
285  
286  
287  
288  
289  
290  
291  
292  
293  
294  
295  
296  
297  
298  
299  
300  
301  
302  
303  
304  
305  
306  
307  
308  
309  
310  
311  
312  
313  
314  
315  
316  
317  
318  
319  
320  
321  
322  
323  
324  
325  
326  
327  
328  
329  
330  
331  
332  
333  
334  
335  
336  
337  
338  
339  
340  
341  
342  
343  
344  
345  
346  
347  
348  
349  
350  
351  
352  
353  
354  
355  
356  
357  
358  
359  
360  
361  
362  
363  
364  
365  
366  
367  
368  
369  
370  
371  
372  
373  
374  
375  
376  
377  
378  
379  
380  
381  
382  
383  
384  
385  
386  
387  
388  
389  
390  
391  
392  
393  
394  
395  
396  
397  
398  
399  
400  
401  
402  
403  
404  
405  
406  
407  
408  
409  
410  
411  
412  
413  
414  
415  
416  
417  
418  
419  
420  
421  
422  
423  
424  
425  
426  
427  
428  
429  
430  
431  
432  
433  
434  
435  
436  
437  
438  
439  
440  
441  
442  
443  
444  
445  
446  
447  
448  
449  
450  
451  
452  
453  
454  
455  
456  
457  
458  
459  
460  
461  
462  
463  
464  
465  
466  
467  
468  
469  
470  
471  
472  
473  
474  
475  
476  
477  
478  
479  
480  
481  
482  
483  
484  
485  
486  
487  
488  
489  
490  
491  
492  
493  
494  
495  
496  
497  
498  
499  
500  
501  
502  
503  
504  
505  
506  
507  
508  
509  
510  
511  
512  
513  
514  
515  
516  
517  
518  
519  
520  
521  
522  
523  
524  
525  
526  
527  
528  
529  
530  
531  
532  
533  
534  
535  
536  
537  
538  
539  
540  
541  
542  
543  
544  
545  
546  
547  
548  
549  
550  
551  
552  
553  
554  
555  
556  
557  
558  
559  
560  
561  
562  
563  
564  
565  
566  
567  
568  
569  
570  
571  
572  
573  
574  
575  
576  
577  
578  
579  
580  
581  
582  
583  
584  
585  
586  
587  
588  
589  
590  
591  
592  
593  
594  
595  
596  
597  
598  
599  
600  
601  
602  
603  
604  
605  
606  
607  
608  
609  
610  
611  
612  
613  
614  
615  
616  
617  
618  
619  
620  
621  
622  
623  
624  
625  
626  
627  
628  
629  
630  
631  
632  
633  
634  
635  
636  
637  
638  
639  
640  
641  
642  
643  
644  
645  
646  
647  
648  
649  
650  
651  
652  
653  
654  
655  
656  
657  
658  
659  
660  
661  
662  
663  
664  
665  
666  
667  
668  
669  
670  
671  
672  
673  
674  
675  
676  
677  
678  
679  
680  
681  
682  
683  
684  
685  
686  
687  
688  
689  
690  
691  
692  
693  
694  
695  
696  
697  
698  
699  
700  
701  
702  
703  
704  
705  
706  
707  
708  
709  
710  
711  
712  
713  
714  
715  
716  
717  
718  
719  
720  
721  
722  
723  
724  
725  
726  
727  
728  
729  
730  
731  
732  
733  
734  
735  
736  
737  
738  
739  
740  
741  
742  
743  
744  
745  
746  
747  
748  
749  
750  
751  
752  
753  
754  
755  
756  
757  
758  
759  
760  
761  
762  
763  
764  
765  
766  
767  
768  
769  
770  
771  
772  
773  
774  
775  
776  
777  
778  
779  
780  
781  
782  
783  
784  
785  
786  
787  
788  
789  
790  
791  
792  
793  
794  
795  
796  
797  
798  
799  
800  
801  
802  
803  
804  
805  
806  
807  
808  
809  
810  
811  
812  
813  
814  
815  
816  
817  
818  
819  
820  
821  
822  
823  
824  
825  
826  
827  
828  
829  
830  
831  
832  
833  
834  
835  
836  
837  
838  
839  
840  
841  
842  
843  
844  
845  
846  
847  
848  
849  
850  
851  
852  
853  
854  
855  
856  
857  
858  
859  
860  
861  
862  
863  
864  
865  
866  
867  
868  
869  
870  
871  
872  
873  
874  
875  
876  
877  
878  
879  
880  
881  
882  
883  
884  
885  
886  
887  
888  
889  
890  
891  
892  
893  
894  
895  
896  
897  
898  
899  
900  
901  
902  
903  
904  
905  
906  
907  
908  
909  
910  
911  
912  
913  
914  
915  
916  
917  
918  
919  
920  
921  
922  
923  
924  
925  
926  
927  
928  
929  
930  
931  
932  
933  
934  
935  
936  
937  
938  
939  
940  
941  
942  
943  
944  
945  
946  
947  
948  
949  
950  
951  
952  
953  
954  
955  
956  
957  
958  
959  
960  
961  
962  
963  
964  
965  
966  
967  
968  
969  
970  
971  
972  
973  
974  
975  
976  
977  
978  
979  
980  
981  
982  
983  
984  
985  
986  
987  
988  
989  
990  
991  
992  
993  
994  
995  
996  
997  
998  
999  
1000

50  
51  
52  
53  
54  
55  
56  
57  
58  
59  
60  
61  
62  
63  
64  
65  
66  
67  
68  
69  
70  
71  
72  
73  
74  
75  
76  
77  
78  
79  
80  
81  
82  
83  
84  
85  
86  
87  
88  
89  
90  
91  
92  
93  
94  
95  
96  
97  
98  
99  
100  
101  
102  
103  
104  
105  
106  
107  
108  
109  
110  
111  
112  
113  
114  
115  
116  
117  
118  
119  
120  
121  
122  
123  
124  
125  
126  
127  
128  
129  
130  
131  
132  
133  
134  
135  
136  
137  
138  
139  
140  
141  
142  
143  
144  
145  
146  
147  
148  
149  
150  
151  
152  
153  
154  
155  
156  
157  
158  
159  
160  
161  
162  
163  
164  
165  
166  
167  
168  
169  
170  
171  
172  
173  
174  
175  
176  
177  
178  
179  
180  
181  
182  
183  
184  
185  
186  
187  
188  
189  
190  
191  
192  
193  
194  
195  
196  
197  
198  
199  
200  
201  
202  
203  
204  
205  
206  
207  
208  
209  
210  
211  
212  
213  
214  
215  
216  
217  
218  
219  
220  
221  
222  
223  
224  
225  
226  
227  
228  
229  
230  
231  
232  
233  
234  
235  
236  
237  
238  
239  
240  
241  
242  
243  
244  
245  
246  
247  
248  
249  
250  
251  
252  
253  
254  
255  
256  
257  
258  
259  
260  
261  
262  
263  
264  
265  
266  
267  
268  
269  
270  
271  
272  
273  
274  
275  
276  
277  
278  
279  
280  
281  
282  
283  
284  
285  
286  
287  
288  
289  
290  
291  
292  
293  
294  
295  
296  
297  
298  
299  
300  
301  
302  
303  
304  
305  
306  
307  
308  
309  
310  
311  
312  
313  
314  
315  
316  
317  
318  
319  
320  
321  
322  
323  
324  
325  
326  
327  
328  
329  
330  
331  
332  
333  
334  
335  
336  
337  
338  
339  
340  
341  
342  
343  
344  
345  
346  
347  
348  
349  
350  
351  
352  
353  
354  
355  
356  
357  
358  
359  
360  
361  
362  
363  
364  
365  
366  
367  
368  
369  
370  
371  
372  
373  
374  
375  
376  
377  
378  
379  
380  
381  
382  
383  
384  
385  
386  
387  
388  
389  
390  
391  
392  
393  
394  
395  
396  
397  
398  
399  
400  
401  
402  
403  
404  
405  
406  
407  
408  
409  
410  
411  
412  
413  
414  
415  
416  
417  
418  
419  
420  
421  
422  
423  
424  
425  
426  
427  
428  
429  
430  
431  
432  
433  
434  
435  
436  
437  
438  
439  
440  
441  
442  
443  
444  
445  
446  
447  
448  
449  
450  
451  
452  
453  
454  
455  
456  
457  
458  
459  
460  
461  
462  
463  
464  
465  
466  
467  
468  
469  
470  
471  
472  
473  
474  
475  
476  
477  
478  
479  
480  
481  
482  
483  
484  
485  
486  
487  
488  
489  
490  
491  
492  
493  
494  
495  
496  
497  
498  
499  
500  
501  
502  
503  
504  
505  
506  
507  
508  
509  
510  
511  
512  
513  
514  
515  
516  
517  
518  
519  
520  
521  
522  
523  
524  
525  
526  
527  
528  
529  
530  
531  
532  
533  
534  
535  
536  
537  
538  
539  
540  
541  
542  
543  
544  
545  
546  
547  
548  
549  
550  
551  
552  
553  
554  
555  
556  
557  
558  
559  
560  
561  
562  
563  
564  
565  
566  
567  
568  
569  
570  
571  
572  
573  
574  
575  
576  
577  
578  
579  
580  
581  
582  
583  
584  
585  
586  
587  
588  
589  
590  
591  
592  
593  
594  
595  
596  
597  
598  
599  
600  
601  
602  
603  
604  
605  
606  
607  
608  
609  
610  
611  
612  
613  
614  
615  
616  
617  
618  
619  
620  
621  
622  
623  
624  
625  
626  
627  
628  
629  
630  
631  
632  
633  
634  
635  
636  
637  
638  
639  
640  
641  
642  
643  
644  
645  
646  
647  
648  
649  
650  
651  
652  
653  
654  
655  
656  
657  
658  
659  
660  
661  
662  
663  
664  
665  
666  
667  
668  
669  
670  
671  
672  
673  
674  
675  
676  
677  
678  
679  
680  
681  
682  
683  
684  
685  
686  
687  
688  
689  
690  
691  
692  
693  
694  
695  
696  
697  
698  
699  
700  
701  
702  
703  
704  
705  
706  
707  
708  
709  
710  
711  
712  
713  
714  
715  
716  
717  
718  
719  
720  
721  
722  
723  
724  
725  
726  
727  
728  
729  
730  
731  
732  
733  
734  
735  
736  
737  
738  
739  
740  
741  
742  
743  
744  
745  
746  
747  
748  
749  
750  
751  
752  
753  
754  
755  
756  
757  
758  
759  
760  
761  
762  
763  
764  
765  
766  
767  
768  
769  
770  
771  
772  
773  
774  
775  
776  
777  
778  
779  
780  
781  
782  
783  
784  
785  
786  
787  
788  
789  
790  
791  
792  
793  
794  
795  
796  
797  
798  
799  
800  
801  
802  
803  
804  
805  
806  
807  
808  
809  
810  
811  
812  
813  
814  
815  
816  
817  
818  
819  
820  
821  
822  
823  
824  
825  
826  
827  
828  
829  
830  
831  
832  
833  
834  
835  
836  
837  
838  
839  
840  
841  
842  
843  
844  
845  
846  
847  
848  
849  
850  
851  
852  
853  
854  
855  
856  
857  
858  
859  
860  
861  
862  
863  
864  
865  
866  
867  
868  
869  
870  
871  
872  
873  
874  
875  
876  
877  
878  
879  
880  
881  
882  
883  
884  
885  
886  
887  
888  
889  
890  
891  
892  
893  
894  
895  
896  
897  
898  
899  
900  
901  
902  
903  
904  
905  
906  
907  
908  
909  
910  
911  
912  
913  
914  
915  
916  
917  
918  
919  
920  
921  
922  
923  
924  
925  
926  
927  
928  
929  
930  
931  
932  
933  
934  
935  
936  
937  
938  
939  
940  
941  
942  
943  
944  
945  
946  
947  
948  
949  
950  
951  
952  
953  
954  
955  
956  
957  
958  
959  
960  
961  
962  
963  
964  
965  
966  
967  
968  
969  
970  
971  
972  
973  
974  
975  
976  
977  
978  
979  
980  
981  
982  
983  
984  
985  
986  
987  
988  
989  
990  
991  
992  
993  
994  
995  
996  
997  
998  
999  
1000

50 **Word Count: 2541**

51  
52  
53 **Tables: 2**

## Abstract

**Objective:** To qualitatively explore factors affecting implementation of caregiver support programs in health care institutions in a regional stroke system.

**Design:** A qualitative descriptive study with the Ontario Stroke System (OSS) was conducted. Data were collected through focus groups and in-depth interviews. Transcripts were coded and analyzed using inductive thematic analysis.

**Setting:** Regional Stroke System, Ontario, Canada.

**Participants:** OSS stakeholders including medical directors, executives, program directors, education coordinators, rehabilitation and community and long-term care specialists, primary care leaders, and health care professionals.

**Intervention:** Not applicable.

**Main Outcome Measures:** Data collection explored perceptions of the need for caregiver support programs and factors that may affect their implementation.

**Results:** Four focus groups (n=43) and 29 interviews were completed. Analyses identified themes related to: 1) evidence that a caregiver program will improve health and health system outcomes; 2) personnel requirements; 3) barriers associated with current billing and referral processes; and 4) integration with current practice and existing workflow processes.

**Conclusions:** Implementation strategies to adopt caregiver programs into clinical practice should incorporate evidence and consider personnel and existing workflow processes.

**Keywords:** caregivers, stroke, organizations, qualitative research

1  
2  
3  
4 **Abbreviations:**  
5

6  
7 OSS – Ontario Stroke System  
8

9  
10 FG – Focus Group  
11

12  
13 HCP – Health Care Professionals  
14

15  
16 MD – Medical Directors  
17

18  
19 RE – Regional Health Executives  
20

21  
22 PL – Primary Care Leaders  
23

24  
25  
26 PRISMA – Program of Research to Integrate the Services for the Maintenance of Autonomy  
27

28  
29 ADLs – Activities of Daily Living  
30  
31  
32  
33  
34  
35  
36  
37  
38  
39  
40  
41  
42  
43  
44  
45  
46  
47  
48  
49  
50  
51  
52  
53  
54  
55  
56  
57  
58  
59  
60

## Article Summary

### Strengths and Limitations of this study

- Our study used in-depth qualitative methods to explore organizational considerations for implementing caregiver programs in a regional stroke system.
- Our study included 72 participants reflecting key stakeholder groups responsible for supporting caregivers and implementing caregiver programs within institutions.
- We did not systematically obtain data related to years of experience in specific roles.
- Additional stakeholder groups (e.g., hospital managers) could have provided additional perspectives on caregiver program implementation.
- More in-depth probing of the specific challenges experienced in rural areas would have expanded our findings.

## Introduction

Family caregivers play a central role in the recovery, rehabilitation, and community re-integration of individuals who experience a stroke. Numerous studies have documented the negative impact providing care can have on caregiver health and wellbeing (1, 2). Previous literature suggest that 12-25% of caregivers experience depression (3, 4) and caregiver burden is positively associated with depression symptoms (5). Taking on the caregiver role can also impact other aspects of a caregiver's life, including leisure, relationships, and work. Relatives who assumed the caregiver role have increased responsibilities, decreased leisure activities and negative changes in their relationships, and the impact on their lives can still be present after a year post-stroke (6). A study conducted in the United States found that the indirect costs associated with caregiving (e.g., traveling time, out-of-pocket expenses) amounted to \$5,669 per caregiver per year, and costs of total lost productivity amounted to more than \$10,000 per year per employed caregiver (7). Taken together, the caregiver role affects many aspects of a caregiver's life and education and support has the potential to enhance their abilities to take on and sustain this important role.

Previous literature recommends the use of multi-component interventions (8) that cross the care continuum (9, 10) to meet caregivers' needs for support. Multicomponent interventions include at least two of the following: information provision (e.g., community resources), emotional support and counseling (e.g., support groups, professional support) and skills training (physical care, problem solving) (8). For example, the 'Timing It Right' Family Stroke Family Support program is a multicomponent intervention that is delivered by a health care professional (stroke support person), who meets with the caregiver in-person in acute care and then follows up with



1  
2  
3 six monthly telephone meetings to discuss caregiver's support needs and potential strategies to  
4 meet these needs (9, 10). However, caregivers are not benefiting from these programs, as they  
5 are not being incorporated into standard clinical practice (11, 12). Research from the United  
6 Kingdom identified program and system level factors that limited the implementation of a stroke  
7 caregiver program into clinical practice (13, 14). Participants reported lack of time and  
8 individuals responsible for ensuring implementation as limiting factors.  
9

10  
11  
12  
13  
14  
15  
16  
17  
18 Caregiver program implementation has been studied in the context of dementia caregiving.  
19  
20 Although there are more than 200 efficacious dementia caregiver programs, only 6 have been  
21 integrated into practice (15). The need to identify contextual factors that may influence  
22 implementation has emerged as an emerging research field and an important step towards  
23 effective integration into practice (15). Previous studies undertook process evaluations during  
24 caregiver program implementation (e.g., (13, 14, 16)). However, the current study aimed to  
25 identify factors that may influence implementation in real-world settings prior to developing or  
26 testing an implementation strategy (17). Our research to date with the Ontario Stroke System  
27 (OSS) (18, 19) has indicated a need to understand implementation of caregiver programs within  
28 institutions. Therefore, the objective of this qualitative descriptive study was to examine program  
29 level factors (i.e., within institutions) that influence local implementation of caregiver programs  
30 in the context of a regional stroke system. For the purposes of this study, a caregiver education  
31 and support program was defined as a structured, time-limited intervention with a basic protocol  
32 and program materials. A program consists of one or more of the following: education, training  
33 and support.  
34  
35  
36  
37  
38  
39  
40  
41  
42  
43  
44  
45  
46  
47  
48  
49  
50  
51  
52  
53  
54  
55  
56  
57  
58  
59  
60

## Methods

### Design

We conducted a qualitative descriptive study (20) and used the SRQR reporting guidelines (21). A qualitative approach is used when the purpose is to understand a specific phenomenon for which there has been limited research and the important variables to explore are unclear (22). There are no previous studies that have examined the implementation of caregiver education and support in standard clinical practice within the Canadian context. Specifically, a qualitative descriptive study design is particularly suited when producing a comprehensive description of participant perceptions of a specific phenomenon because data analysis and interpretation stays close to the data and participant perceptions are considered to be accurate and truthful reflections of the reality of the phenomenon (i.e., caregiver program implementation) (20). Participants were recruited from the OSS – regional system of stroke care in the province of Ontario. The OSS is publicly funded, includes 11 geographical regions, and provides specialized stroke care across the continuum. Each region includes a Regional Stroke Centre or Enhanced District Stroke Centre, community hospitals, rehabilitation hospitals, community-based providers and pre-hospital providers (23). Some of the regions are large encompassing rural areas and some are small and urban. There are 9 Regional Stroke Centres, 2 Enhanced District Stroke Centres, 16 District Stroke Centres, and 24 secondary prevention clinics (23). Institutional ethics boards, including the University of Toronto Research Ethics Board, approved the study. All participants provided written consent. This study was situated in the Knowledge-to-Action Framework's (24) barrier assessment step to identify facilitators and barriers in the local context. The Consolidated Framework for Implementation Research (25) informed data collection.

## **Patient and Public Involvement**

Patients and the public were not involved in the design of this research. Participants, as described below, were involved in this research through in-depth interviews and focus groups where they contributed their thoughts about caregivers and program implementation. Findings have been presented at local and national stroke conferences which is commonly attended by many participants and they will receive copies of publications.

## **Participants**

Participants were recruited from the 11 OSS regions including: Program Directors, Rehabilitation Specialists, Community and Long-Term Care Specialists, Education Coordinators, Medical Directors, and health care professionals providing stroke care in acute, rehabilitation, and community settings, and from the broader health care system including regional health executives, and primary care leaders. Regional Rehabilitation Specialists, Professional Education Coordinators, Community and Long-Term Care Specialists, and Regional/District Program Directors were invited by the corresponding author via email to participate in a focus group as part of regularly scheduled group meetings. Regional Medical Directors, health executives, and primary care leaders were invited by the corresponding author via email to participate in an interview. OSS Education Coordinators assisted with recruitment of health care professionals by emailing the study invitation to attendees of their education sessions. The primary author then coordinated and conducted all interviews and focus groups.

None of the members of the research team had any formal relationships with the participants.

The corresponding author has shared their research with members of the Ontario Stroke System through invited presentations and workshops.

## Data Collection

Participants were asked to discuss: 1) perceptions of the availability, importance, and effectiveness of caregiver programs; 2) current practices related to caregiver education and support; and 3) program level implementation considerations. The focus group and interview questions incorporated the domains of the Consolidated Framework for Implementation Research (CFIR) (25) to explore how individual and institution-level factors influence caregiver program implementation (see supplemental appendix). For example, individual level factors such as understanding of caregiver needs, the institution's ability to address caregiver needs, and the evidence base for caregiver programs can all influence program implementation (25).

Participants were asked to reflect on all caregiver programs in general and then more specifically on caregiver programs that cross care environments using the Timing It Right Stroke Family Support Program (9, 10) as an example. Focus groups were conducted in person at the local Heart and Stroke Foundation office and interviews were conducted by telephone. The primary author collected all data and is an occupational therapist and doctoral candidate with training in qualitative interviewing. Data collection took place over the course of four months and ended when data saturation was reached. Qualitative, semi-structured interviews and focus groups were audio-recorded, transcribed verbatim, reviewed for accuracy, and de-identified.

## Data Analysis

Qualitative thematic analysis is commonly used to analyze data in qualitative descriptive studies (20). Data were analyzed using inductive thematic analysis (26) and facilitated using NVivo (27). The first author coded all of the data and all authors reviewed the data and contributed to theme generation. Reflexive notes and field notes were taken throughout data

collection and analysis to ensure the dependability and confirmability of the findings (20). To maximize the credibility of the findings, all authors reviewed data and contributed to theme generation (28).

## Results

Four focus groups (n=43) and 29 individual interviews yielded 72 participants (see tables 1 and 2). Four themes related to: 1) need for evidence that a caregiver program will improve patient and caregiver health and health system outcomes after “real world” implementation; 2) personnel requirements; 3) barriers associated with current billing and referral processes; and 4) integration with current practice and workflow processes. Participant quotations from focus groups (FG) and interviews with health care professionals (HCP), medical directors (MD), regional health executives (RE), and primary care leaders (PL) are identified by number.

**Table 1: Professional role of participants:** A summary of study participants’ professional roles.

| Participant Group                   | Number (%) of Participants (n=72)* |
|-------------------------------------|------------------------------------|
| Regional/District Program Directors | 19 (26%)                           |
| Community and Long-Term Care        | 7 (10%)                            |
| Regional Education Coordinators     | 7 (10%)                            |
| Regional Rehabilitation Specialists | 11 (15%)                           |
| Regional Medical Directors (INT)    | 2 (3%)                             |
| Health Region Executives (INT)      | 4 (6%)                             |

1  
2  
3  
4  
5  
6  
7  
8  
9  
10  
11  
12  
13  
14  
15  
16  
17  
18  
19  
20  
21  
22  
23  
24  
25  
26  
27  
28  
29  
30  
31  
32  
33  
34  
35  
36  
37  
38  
39  
40  
41  
42  
43  
44  
45  
46  
47  
48  
49  
50  
51  
52  
53  
54  
55  
56  
57  
58  
59  
60

| <b>Participant Group</b>         | <b>Number (%) of Participants (n=72)*</b> |
|----------------------------------|-------------------------------------------|
| Health Region Primary Care Leads | 4 (6%)                                    |
| Health Care Professionals (INT)  | 19 (26%)                                  |

Abbreviations: FG, focus group; INT, interview.

\*One participant had a dual role.

For peer review only

**Table 2: Health Care Professionals by Sector and Occupation:** A summary of study participants' clinical sector and profession.

| <b>Health Care Professionals by Sector and Occupation</b> |                                          |
|-----------------------------------------------------------|------------------------------------------|
| <b>Sector</b>                                             | <b>Number (%) of Participants (N=19)</b> |
| Acute                                                     | 5 (26%)                                  |
| Rehabilitation                                            | 7 (37%)                                  |
| Community                                                 | 6 (32%)                                  |
| Private                                                   | 1 (5%)                                   |
| <b>Profession</b>                                         |                                          |
| Occupational Therapist                                    | 5 (26%)                                  |
| Physical Therapist                                        | 4 (21%)                                  |
| Speech Language Pathologist                               | 3 (16%)                                  |
| Physiatrist/Recreational Therapist/Stroke Care Navigator  | 3 (16%)                                  |
| Registered Nurse                                          | 2 (11%)                                  |
| Social Worker                                             | 2 (11%)                                  |

**Theme 1: Need for evidence that a caregiver program will improve patient and caregiver health and health system outcomes after “real world” implementation**

Participants discussed the role of evidence, including program evaluation, to support funding, implementation, and sustainability of caregiver programs. Participants suggest

1  
2  
3 stakeholders differ in their preferences for process (e.g., program attendance) or outcomes (e.g.,  
4 health and health system outcomes) data. For example, some prefer numerical data to support  
5 implementation (e.g., program attendance) while others are looking for success stories (e.g.,  
6 patient stories). The following quotation describes the roles of pilot testing and program  
7 evaluation to sustain implementation in practice:  
8  
9  
10  
11  
12  
13

14 But the point I'm trying to get across is that...the organization if they see...there's  
15 research to back up the effectiveness of it [caregiver program]...then they'll pilot it...  
16 to see if it's working, and then...upper management...they'll look at the number of  
17 people who are taking advantage of the programs cause it all comes down to numbers  
18 for organizations, right. And...if it is working right then that pilot program can  
19 become...a regular program that the hospital runs and incorporates as a part of their  
20 budget. (HCP 19)  
21  
22  
23  
24  
25  
26  
27  
28  
29

## 30 **Theme 2: Personnel Requirements**

31  
32 Many participants agreed that existing team members would not be able to assume this  
33 added responsibility so a new role was needed. In terms of creating a new role, three  
34 considerations were discussed: 1) similarity with existing roles; 2) integration into a community-  
35 based navigator role; and 3) integration into health care teams in acute and rehabilitation settings.  
36 A few participants highlighted the overlap with existing roles (e.g., community care case  
37 managers) so this role would need to be clearly defined:  
38  
39  
40  
41  
42  
43  
44  
45

46 ...defining whose role is what and again who's responsible for what, because if you're  
47 doing a quarter of the discharge planner's job and you're doing thirty percent of the  
48 family doctor's job...there's too much duplication in the hospital and in the health care.  
49  
50  
51  
52  
53  
54 (HCP 15)  
55  
56  
57  
58  
59  
60



1  
2  
3 Some participants spoke about the navigator role in which an individual supports patients  
4 and families in the community. Perspectives differed as to the possibility of integrating caregiver  
5 support into this role as their availability and function varied by region: "...not every region has  
6 a navigator...and those that do they function very differently" (FG 3).  
7  
8  
9  
10  
11

12 Participants questioned the feasibility of having a position that crosses care environments  
13 because current practice does not include contact with patients and their caregivers after they  
14 leave the institution. While they indicated the desire for a single point of contact for caregiver  
15 support, they spoke about the challenge of determining funding sources and sustainability with  
16 current fiscal restraints. The following quotation raises the issue of funding and ownership for  
17 this role, particularly in cases where acute and rehabilitation care are separate institutions:  
18  
19  
20  
21  
22  
23  
24  
25

26 This acute person follows the patient through their rehab stay to community...how does  
27 that work when it's [rehab] a separate facility? Like the ownership ... that's why the  
28 idea of dedicated resources seems to be a good fit to overcome that barrier because if  
29 you think about it, if someone's being paid by [hospital A] to handle [hospital A]  
30 patients and...and they're off to another...that's what I'm thinking is a barrier for  
31 you... (FG 4)  
32  
33  
34  
35  
36  
37  
38  
39

40 The increasingly large caseload this single person would have to manage was also  
41 mentioned as a concern for the feasibility of this approach: "...just by the nature of the beast it's  
42 most likely that you're going to...need a few of these individuals...because their caseload is  
43 going to just get bigger and bigger..." (FG 4). Instead, some participants suggested that caregiver  
44 support be organized by care environment with health care teams picking up the education where  
45 the last team finished. The following quotation provides an example: "I can see it working  
46 as...the stroke nurse's role to take it from point A to point B and then...it would be the social  
47  
48  
49  
50  
51  
52  
53  
54  
55

1  
2  
3 worker and rehab's role to be from this section to this section and then it would be the  
4  
5 community navigator or the outpatient OT...to be taken to the next stage..." (FG 3).  
6

7  
8 In addition, some participants felt that it may be more likely to be funded if it was used  
9  
10 region-wide. However, in geographically larger stroke regions, it would be very challenging for  
11  
12 one individual to cover the entire region:  
13

14  
15 And the individual has to be a regional resource versus organizational. So they can't  
16  
17 necessarily belong to a specific hospital but they have to have the capacity to cover a  
18  
19 region and be flexible in that...which is a barrier up north. (FG 2)  
20

21  
22 Participants had different perspectives regarding the role of health care professionals in  
23  
24 providing caregiver support. This individual would need to be knowledgeable about acute care,  
25  
26 rehabilitation, and community care and to stay up-to-date with community resources. He or she  
27  
28 would have counseling skills and a good understanding of each of the disciplines on the health  
29  
30 care team. Some participants provided examples of specific health care professionals they  
31  
32 perceived to be most appropriate for this role, including occupational therapists, social workers,  
33  
34 nurses, and other allied health professionals.  
35  
36

37  
38 Participants questioned the use of trained volunteers or non-health care professionals.  
39  
40 Some of the regional health executives discussed the limited availability and high costs of health  
41  
42 care professionals as the main reasons to consider volunteers. The following quotation highlights  
43  
44 this point: "So it may be a costly model if the person is a health care professional. There may be  
45  
46 other models where you use peers, somebody who's had a similar experience or volunteers who  
47  
48 have been trained" (RE 4). However, there might be instances when the issues facing the  
49  
50 families are predominantly medical in nature, and these personnel may not be able to address  
51  
52 such issues:  
53  
54  
55

1  
2  
3 ...the challenge would be and we've seen it with community navigators when it's an  
4 orphan patient and we have a community navigator following them but all their issues  
5 are medical...that community navigator is not equipped to provide advice or to plan  
6 any intervention other than to say go to a walk in clinic or et cetera. And that then it  
7 becomes a challenge for both parties. (FG 1)  
8  
9  
10  
11  
12  
13

### 14 **Theme 3: Barriers associated with current billing and referral processes**

15  
16 Participants agreed that existing infrastructure should incorporate caregiver programs.  
17 However, participants identified several challenges. Health care professionals and Rehabilitation  
18 Specialists suggested that organizational referral criteria and government-funded health  
19 insurance precludes caregivers from being formal units of care. One participant explained that  
20 there are community-based activities that would be appropriate for the patient-caregiver dyad,  
21 but because the organization's mandate is to provide services to individuals with disabilities and  
22 there is no billing structure for services provided to caregivers, caregivers are not included. The  
23 following quotation demonstrates how the current billing structure and referral criteria hinder the  
24 provision of caregiver support within health care organizations:  
25  
26  
27  
28  
29  
30  
31  
32  
33  
34  
35  
36

37 Let's say we register the caregiver as a patient, then they need a chart. Then they need  
38 space in health records. Like then we have to track them that way...if the caregiver  
39 now becomes the patient then you need to refer them to mental health if that's the issue.  
40  
41 Do you know what I mean...So whether or not our institution would adopt that would  
42 be really interesting to see. I doubt it...Cause then a cost comes in. (HCP 10)  
43  
44  
45  
46  
47  
48

### 49 **Theme 4: Integration with current practice and existing workflow processes**

50  
51 Participants discussed four facilitators to the integration of caregiver support into current  
52 practice and existing workflow processes. Potential challenges were also discussed.  
53  
54  
55  
56  
57  
58  
59  
60

1  
2  
3 First, participants suggested the caregiver support role should become part of routine  
4 practice. This approach may overcome limited therapist time to provide support in both inpatient  
5 and community care.  
6  
7  
8  
9

10 Second, participants were concerned with incorporating caregiver support into patient  
11 charts. A few participants indicated that there are no places in patient charts to document the  
12 specific education provided. If education became required practice, the tendency might be to  
13 provide the support for the sake of checking off the box as opposed to paying attention to the  
14 content, timing, or the readiness of the caregiver to receive this information. The following  
15 quotation underscores the challenges with incorporating caregiver support into existing  
16 documentation, particularly when these programs cross care environments:  
17  
18  
19  
20  
21  
22  
23  
24  
25

26 ...so if there is a way to [tick off] have you done your section of [caregiver program]  
27 ...you would almost have to be embedded in documentation somehow too so that it is  
28 not missed and that would be hard because... once that patient is gone, so is their  
29 chart...you are not even supposed to go into the chart after... (FG 3)  
30  
31  
32  
33  
34

35 Third, participants emphasized communication between the individual providing  
36 caregiver support and the rest of the care team to ensure consistency and continuity in messaging  
37 to caregivers. This was noted as a challenge in community care because team members do not  
38 necessarily communicate with one another or know who else is working with the patient.  
39  
40  
41  
42  
43  
44

45 Lastly, participants highlighted the importance of having a formalized and structured  
46 approach to guide implementation. This would require ready-made materials that can be adapted  
47 to local contexts, developing a clear referral and monitoring system, setting target user criteria,  
48 and establishing a mechanism for re-accessing caregivers if they initially decline the program.  
49  
50  
51  
52  
53  
54 Participants suggested some health care professions would need education and tools to assess  
55  
56  
57  
58  
59  
60

1  
2  
3 caregivers' needs and provide appropriate supports. Training may also enhance soft skills as  
4  
5 many health care professionals may be more comfortable with the more technical aspects of their  
6  
7 clinical work.  
8  
9

## 10 **Discussion**

11  
12 The objective of this study was to identify factors that influence implementation of  
13  
14 caregiver programs within institutions. The four themes suggest that the availability of evidence  
15  
16 to support program outcomes, personnel requirements, and a supportive structure including  
17  
18 billing, workflow and resources are important for caregiver program implementation.  
19  
20

21  
22 As we aim to support transitions across the care continuum (9, 10, 29, 30), our findings  
23  
24 suggest one potential approach to implementing a program that crosses care environments. This  
25  
26 would involve offering a program across care environments with health care teams picking up  
27  
28 the education where the last team finished. Caregivers, however, prefer having one individual  
29  
30 provide support across the care continuum (31). One possible solution to address these  
31  
32 differences in perspectives comes from the aging literature. Stroke care could adopt an integrated  
33  
34 service delivery model such as one proposed for the frail elderly. The PRISMA (Program of  
35  
36 Research to Integrate the Services for the Maintenance of Autonomy) model uses case managers  
37  
38 to coordinate and monitor the needs of frail elderly across care environments and has  
39  
40 demonstrated positive impacts on patient and caregiver health, and health care utilization (32,  
41  
42 33). The applicability of this service delivery model to stroke care warrants further consideration.  
43  
44 Participant responses indicated that various health care professionals would be suitable to  
45  
46 provide support to caregivers. One example is occupational therapists where previous literature  
47  
48 suggests that occupational therapists can serve an important role in addressing the needs of  
49  
50 caregivers (34). Occupational therapists are a core member of multi-disciplinary stroke teams  
51  
52  
53  
54  
55

1  
2  
3 and they contribute to caregiver training (e.g., teaching ADLs) (35, 36). Beyond training in  
4  
5 ADLs, occupational therapists' training in mental health and meaningful occupations prepares  
6  
7 them for addressing the psychosocial effects of caregiving (35). There is a need to address  
8  
9 caregivers' needs such that they are able to maintain both their own health and engagement in  
10  
11 valued activities and provide care for their loved ones (6). This previous research (6) and our  
12  
13 study findings highlight occupational therapists as a potential source of support for caregivers.  
14  
15

16  
17 Current billing structures and referral criteria preclude the provision of services to  
18  
19 caregivers in standard clinical practice. This suggests a need to expand organizational structures  
20  
21 for billing, referral and documentation to include caregiver support. As demonstrated in the  
22  
23 PRISMA model, information systems (e.g., computerized client chart that is available across  
24  
25 organizations) can be developed to overcome organizational structures (32). The integration of  
26  
27 caregivers into information systems can facilitate program implementation (14).  
28  
29  
30  
31  
32

### 33 **Strengths and Limitations**

34  
35 Our study used in-depth qualitative methods to explore organizational considerations for  
36  
37 implementing caregiver programs in a regional stroke system. Our study included 72 participants  
38  
39 reflecting key stakeholder groups responsible for supporting caregivers and implementing  
40  
41 caregiver programs within institutions. We did not systematically obtain data related to years of  
42  
43 experience in specific roles. Additional stakeholder groups (e.g., hospital managers) could have  
44  
45 provided additional perspectives on caregiver program implementation. More in-depth probing  
46  
47 of the specific challenges experienced in rural areas would have expanded our findings.  
48  
49  
50

51 In summary, our study was one of the first to examine implementation of caregiver  
52  
53 programs within a regional stroke system. It adds to the existing literature by delineating  
54  
55

1  
2  
3 implementation considerations and highlighting the potential role for occupational therapists and  
4  
5 other health care professionals as providers of caregiver support.  
6  
7  
8  
9  
10  
11  
12  
13  
14  
15  
16  
17  
18  
19  
20  
21  
22  
23  
24  
25  
26  
27  
28  
29  
30  
31  
32  
33  
34  
35  
36  
37  
38  
39  
40  
41  
42  
43  
44  
45  
46  
47  
48  
49  
50  
51  
52  
53  
54  
55  
56  
57  
58  
59  
60

For peer review only

### **Conflict of Interest**

Authors have no conflicts of interest to declare.

### **Author Contributions**

VT contributed to the project conceptualization and design, data acquisition and qualitative interviewing, coding and data analysis, theme generation, drafting and revising the manuscript.

SJ contributed to project conceptualization and design, qualitative data analysis, theme generation and revisions to the final manuscript.

NMS contributed to project conceptualization and design, qualitative data analysis, theme generation and revisions to the final manuscript.

JIC contributed to the project conceptualization and design, qualitative data analysis, theme generation, drafting and revising the manuscript.

### **Data Availability**

Data may be accessed by contacting the corresponding author.



## References

1. Rigby H, Gubitz G, Phillips S. A systematic review of caregiver burden following stroke. *Int J Stroke*. 2009;4(4):285-92.
2. Gaugler JE. The longitudinal ramifications of stroke caregiving: a systematic review. *REHABIL PSYCHOL*. 2010;55(2):108-25.
3. Roth DL, Haley WE, Sheehan OC, Liu C, Clay OJ, Rhodes JD, et al. Depressive Symptoms After Ischemic Stroke: Population-Based Comparisons of Patients and Caregivers With Matched Controls. *Stroke*. 2020;51(1):54-60.
4. Rohde D, Gaynor E, Large M, Conway O, Bennett K, Williams DJ, et al. Stroke survivor cognitive decline and psychological wellbeing of family caregivers five years post-stroke: a cross-sectional analysis. *Top Stroke Rehabil*. 2019;26(3):180-6.
5. Del-Pino-Casado R, Rodriguez Cardosa M, Lopez-Martinez C, Orgeta V. The association between subjective caregiver burden and depressive symptoms in carers of older relatives: A systematic review and meta-analysis. *PLoS One*. 2019;14(5):e0217648.
6. Pellerin C, Rochette A, Racine E. Social participation of relatives post-stroke: the role of rehabilitation and related ethical issues. *Disabil Rehabil*. 2011;33(13-14):1055-64.
7. Ganapathy V, Graham GD, DiBonaventura MD, Gillard PJ, Goren A, Zorowitz RD. Caregiver burden, productivity loss, and indirect costs associated with caring for patients with poststroke spasticity. *Clin Interv Aging*. 2015;10:1793-802.
8. White cL, Cantu, A.G., Trevino, M.M. Interventions for caregivers of stroke survivors: An update of the evidence. *Clinical Nursing Studies*. 2015;3(3):9.
9. Cameron JI, Naglie G, Gignac MA, Bayley M, Warner G, Green T, et al. Randomized clinical trial of the timing it right stroke family support program: research protocol. *BMC Health Serv Res*. 2014;14:18.
10. Cameron JI, Naglie G, Green TL, Gignac MA, Bayley M, Huijbregts M, et al. A feasibility and pilot randomized controlled trial of the "Timing it Right Stroke Family Support Program". *Clin Rehabil*. 2014.
11. Rochette A, Korner-Bitensky N, Desrosiers J. Actual vs best practice for families post-stroke according to three rehabilitation disciplines. *J Rehabil Med*. 2007;39(7):513-9.
12. Rochette A, Racine E, Lefebvre H, Bastien J, Tellier M. Actual and ideal services in acute care and rehabilitation for relatives post-stroke from three perspectives: Relatives, stroke clients and health professionals. *J Rehabil Med*. 2014;46(1):16-22.
13. Clarke DJ, Hawkins R, Sadler E, Harding G, McKeivitt C, Godfrey M, et al. Introducing structured caregiver training in stroke care: findings from the TRACS process evaluation study. *BMJ Open*. 2014;4(4):e004473.
14. Clarke DJ, Godfrey M, Hawkins R, Sadler E, Harding G, Forster A, et al. Implementing a training intervention to support caregivers after stroke: a process evaluation examining the initiation and embedding of programme change. *Implement Sci*. 2013;8:96.
15. Gitlin LN, Marx K, Stanley IH, Hodgson N. Translating Evidence-Based Dementia Caregiving Interventions into Practice: State-of-the-Science and Next Steps. *Gerontologist*. 2015;55(2):210-26.

16. Paone D. Using RE-AIM to evaluate implementation of an evidence-based program: a case example from Minnesota. *J Gerontol Soc Work*. 2014;57(6-7):602-25.
17. Corporation CfDCaPtK-C. Assuring Healthy Caregivers, a Public Health Approach to Translating Research into Practice: The RE-AIM Framework. Neenah, WI; 2008.
18. Tseung V, Jaglal SB, Salbach NM, Cameron JI. Implementing Caregiver Support Programs in a Regional Stroke System. *Stroke*. 2019:STROKEAHA119026660.
19. Tseung V, Jaglal SB, Salbach NM, Yoshida K, Cameron JI. Key informants' perspectives on implementing caregiver programs in an organized system of stroke care. *Disabil Rehabil*. 2019:1-8.
20. Sandelowski M. What's in a name? Qualitative description revisited. *Res Nurs Health*. 2010;33(1):77-84.
21. O'Brien BC, Harris IB, Beckman TJ, Reed DA, Cook DA. Standards for reporting qualitative research: a synthesis of recommendations. *Acad Med*. 2014;89(9):1245-51.
22. Creswell JW. *Research Design: Qualitative, quantitative and mixed method approaches*. 2nd ed. Thousand Oaks, CA: Sage Publications Inc.; 2003 2003.
23. Lewis M, Trypuc J, Lindsay P, O'Callaghan C, Dishaw A. Has Ontario's Stroke System Really Made a Difference? *Healthcare Quarterly* 4; 20062006. p. 50-9.
24. Graham ID, Logan J, Harrison MB, Straus SE, Tetroe J, Caswell W, et al. Lost in knowledge translation: time for a map? *J Contin Educ Health Prof*. 2006;26(1):13-24.
25. Damschroder LJ, Aron DC, Keith RE, Kirsh SR, Alexander JA, Lowery JC. Fostering implementation of health services research findings into practice: a consolidated framework for advancing implementation science. *Implement Sci*. 2009;4:50.
26. Braun V, Clarke V. Using thematic analysis in psychology. *Qualitative Research in Psychology*. 2006;3(2):77-101.
27. NVivo qualitative data analysis software. 10.0 ed: QSR International Pty Ltd.; 2012.
28. McReynolds CJ, Koch LC, Rumrill PD, Jr. Speaking of research. *Qualitative research strategies in rehabilitation*. *WORK: A Journal of Prevention, Assessment & Rehabilitation*. 2001;16(1):57-65.
29. Cameron JI, Tsoi C, Marsella A. Optimizing stroke systems of care by enhancing transitions across care environments. *Stroke*. 2008;39(9):2637-43.
30. Cameron JI, O'Connell C, Foley N, Salter K, Booth R, Boyle R, et al. Canadian Stroke Best Practice Recommendations: Managing transitions of care following Stroke, Guidelines Update 2016. *Int J Stroke*. 2016;11(7):807-22.
31. Cameron JI, Naglie G, Silver FL, Gignac MA. Stroke family caregivers' support needs change across the care continuum: a qualitative study using the timing it right framework. *Disabil Rehabil*. 2013;35(4):315-24.
32. Hebert R, Durand PJ, Dubuc N, Tourigny A. PRISMA: a new model of integrated service delivery for the frail older people in Canada. *International Journal of Integrated Care*. 2003;3:1-8.
33. Hebert R, Raiche M, Dubois MF, Gueye NR, Dubuc N, Tousignant M, et al. Impact of PRISMA, a coordination-type integrated service delivery system for frail older people in Quebec (Canada): A quasi-experimental study. *J Gerontol B Psychol Sci Soc Sci*. 2010;65B(1):107-18.

- 1  
2  
3 34. Coutinho F, Hersch G, Davidson H. The Impact of Informal Caregiving on Occupational  
4 Therapy: Practice Review and Analysis. *Physical & Occupational Therapy In Geriatrics*.  
5 2006;25(1):47-61.  
6  
7 35. Moghimi C. Issues in Caregiving: The Role of Occupational Therapy in Caregiver  
8 Training. *Topics in Geriatric Rehabilitation*. 2007;23(3):11.  
9  
10 36. Lawson S, Rowe, A., Meredith, Y.Y. . Survey of Stroke Caregiver Training provided by  
11 OT, PT, and SLP across Practice Settings. *Physical and Occupational Therapy*. 2015;33(4):36.  
12  
13  
14  
15  
16  
17  
18  
19  
20  
21  
22  
23  
24  
25  
26  
27  
28  
29  
30  
31  
32  
33  
34  
35  
36  
37  
38  
39  
40  
41  
42  
43  
44  
45  
46  
47  
48  
49  
50  
51  
52  
53  
54  
55  
56  
57  
58  
59  
60

For peer review only

1  
2  
3  
4  
5  
6  
7  
8  
9  
10  
11  
12  
13  
14  
15  
16  
17  
18  
19  
20  
21  
22  
23  
24  
25  
26  
27  
28  
29  
30  
31  
32  
33  
34  
35  
36  
37  
38  
39  
40  
41  
42  
43  
44  
45  
46  
47  
48  
49  
50  
51  
52  
53  
54  
55  
56  
57  
58  
59  
60

# Appendix I Interview/Focus Group Guides for Qualitative Descriptive Study

For peer review only

## Focus Group Questions – Regional Community and Long-Term Care Specialists

1. What are your perceptions of caregiver education and support programs in terms of their utility, effectiveness and importance?
2. Please think about the programs you have implemented for patient education, caregiver education or caregiver support.
  - a. How did you go about implementing these programs?
  - b. What was your experience with implementing these programs?
  - c. If you have not implemented these types of programs, why?
3. The Timing It Right Stroke Family Support Program is an example of a structured caregiver program. The program uses a stroke support person (health care professional) to provide family caregivers with education and support in person and by telephone across care environments. The stroke support person meets with family caregivers in acute care to start providing support and to provide them with the program guide. The stroke support person will then conduct monthly follow-up telephone calls to address their support needs and to go over relevant information in the guide. The stroke support person follows family caregivers for approximately the first six months post stroke. This program aims to provide timely and tailored education and support to family caregivers. If you consider a structured caregiver support program like this one;
  - a. What factors would facilitate your region to implement this type of program?
  - b. What factors would hinder your region from implementing this type of program?
  - c. How could these factors be overcome?
4. What other thoughts do you have about meeting the needs of family caregivers?

### **Ending Question**

5. Do you have any final thoughts for us today?

Thank you for taking the time to participate and share your thoughts with us.

## Focus Group Questions – Regional Education Coordinators

1. In your region, what has been one key challenge to educating health care professionals to implement best practice recommendations in clinical practice?
2. Please think about the health care professional education initiatives you have implemented. How have these initiatives address the provision of patient and family education across the care continuum?
3. The Timing It Right Stroke Family Support Program is an example of a structured caregiver program. The program uses a stroke support person (health care professional) to provide family caregivers with education and support in person and by telephone across care environments. The stroke support person meets with family caregivers in acute care to start providing support and to provide them with the program guide. The stroke support person will then conduct monthly follow-up telephone calls to address their support needs and to go over relevant information in the guide. The stroke support person follows family caregivers for approximately the first six months post stroke. This program aims to provide timely and tailored education and support to family caregivers. If you consider a structured caregiver support program like this one; how could this type of program be incorporated into your regional education initiatives to facilitate its implementation into clinical practice?
4. What other thoughts do you have about meeting the needs of family caregivers?

### **Ending Question**

5. Do you have any final thoughts for us today?

Thank you for taking the time to participate and share your thoughts with us.

## Focus Group Questions – Regional/District Program Directors

1. What are your perceptions of caregiver education and support programs in terms of their utility, effectiveness and importance?
2. What programs have you implemented for patient education, caregiver education or caregiver support?
  - a. How did you go about implementing these programs?
  - b. What was your experience with implementing these programs?
  - c. If you have not implemented these types of programs, why?
3. The Timing It Right Stroke Family Support Program is an example of a structured caregiver program. The program uses a stroke support person (health care professional) to provide family caregivers with education and support in person and by telephone across care environments. The stroke support person meets with family caregivers in acute care, provides them with the program guide, and then conducts monthly follow-up telephone calls to address their support needs and to go over relevant information in the guide. The stroke support person follows family caregivers for approximately the first six months post stroke. This program aims to provide timely and tailored education and support to family caregivers. If you consider a structured caregiver support program like this one;
  - a. What factors would facilitate your region/district to implement this type of program?
  - b. What factors would hinder your region/district from implementing this type of program?
  - c. How could these factors be overcome?
4. What other thoughts do you have about meeting the needs of family caregivers?

### **Ending Question**

5. Do you have any final thoughts for us today?

Thank you for taking the time to participate and share your thoughts with us.

## Focus Group Questions – Regional Rehabilitation Specialists

1. What are your perceptions of caregiver education and support programs in terms of their utility, effectiveness and importance?
2. Please think about the programs you have implemented for patient education, caregiver education or caregiver support.
  - a. How did you go about implementing these programs?
  - b. What was your experience with implementing these programs?
  - c. If you have not implemented these types of programs, why?
3. The Timing It Right Stroke Family Support Program is an example of a structured caregiver program. The program uses a stroke support person (health care professional) to provide family caregivers with education and support in person and by telephone across care environments. The stroke support person meets with family caregivers in acute care to start providing support and to provide them with the program guide. The stroke support person will then conduct monthly follow-up telephone calls to address their support needs and to go over relevant information in the guide. The stroke support person follows family caregivers for approximately the first six months post stroke. This program aims to provide timely and tailored education and support to family caregivers. If you consider a structured caregiver support program like this one;
  - a. What factors would facilitate your region to implement this type of program?
  - b. What factors would hinder your region from implementing this type of program?
  - c. How could these factors be overcome?
4. What other thoughts do you have about meeting the needs of family caregivers?

### **Ending Question**

5. Do you have any final thoughts for us today?

Thank you for taking the time to participate and share your thoughts with us.



## Interview Guide – Health Care Professional Questions

1. Please tell us who you are, your professional training, and your role in the Ontario Stroke System.
2. Can you describe your involvement with family caregivers to stroke survivors?
3. What education and supports do family caregivers receive in your institution?
  - a. What is done well?
  - b. What could be done better?
  - c. What are your institution's future plans for offering programs to family caregivers?
4. What are your perceptions of caregiver education and support programs in terms of their utility and effectiveness?
  - a. Do you think your perceptions are in line with the perception of the health care organization you are currently in?
  - b. If not, in what ways are they different?
  - c. What factors would help your health care organization adopt family caregiver education and support programs into practice?
  - d. What factors are hindering your health care organization from adopting family caregiver education and support programs into practice?
  - e. What solutions would you propose to address these factors?
5. Our caregiver education and support program uses a stroke support person (health care professional) to provide family caregivers with education and support in person and by telephone across care environments; what factors would influence your health care organization to adopt this program?
  - a. What would be some of the barriers to adopting this program? What solutions would you propose to address these barriers?
6. What other thoughts do you have about meeting the needs of family caregivers?

### **Ending Questions**

7. If you could make one change to the health care system to make things better for family caregivers, what would that change be?

1  
2  
3  
4  
5  
6  
7  
8  
9  
10  
11  
12  
13  
14  
15  
16  
17  
18  
19  
20  
21  
22  
23  
24  
25  
26  
27  
28  
29  
30  
31  
32  
33  
34  
35  
36  
37  
38  
39  
40  
41  
42  
43  
44  
45  
46  
47  
48  
49  
50  
51  
52  
53  
54  
55  
56  
57  
58  
59  
60

8. Do you have any final thoughts for me today?

Thank you for taking the time to participate and share your thoughts.

For peer review only

## Interview Guide – Local Health Integration Network Executive

1. Please tell me about your professional training and your role in the Local Health Integration Network
2. What are your perceptions of the need for, availability, and effectiveness of caregiver education and support programs?
3. What initiatives specifically targeting family caregivers are in place or in development? Can you describe them?
4. One model of a caregiver education and support program uses a stroke support person (health care professional) to provide family caregivers with education and support starting in acute care by meeting with them in person and then calling them monthly for approximately the first six months post stroke.
  - a. What could facilitate the implementation of this program into practice across your LHIN?
  - b. What could hinder the implementation of this program into practice across your LHIN?
  - c. What solutions would you propose to address these barriers?

### **Ending Questions**

5. What other thoughts do you have about meeting the needs of family caregivers?
6. If you could make one change to the health care system to make things better for family caregivers, what would that change be?
7. Do you have any final thoughts for me today?

Thank you for taking the time to participate and share your thoughts.

## Interview Guide – Local Health Integration Networks (LHIN) Primary Care Leads

1. How did the LHIN primary care leads group come about? Please describe your role as the primary care lead.
2. What initiatives specifically targeting family caregivers are in place or in development? Can you describe them?
3. How would caregiver education and support programs fit into primary care across your LHIN?
  - a. What factors would help the implementation of family caregiver education and support programs into practice?
  - b. What factors would hinder the implementation of family caregiver education and support programs into practice?
  - c. What solutions would you propose to address these factors?

### **Ending Questions**

4. What other thoughts do you have about meeting the needs of family caregivers?
5. If you could make one change to the health care system to make things better for family caregivers, what would that change be?
6. Do you have any final thoughts for me today?

Thank you for taking the time to participate and share your thoughts.

## Standards for Reporting Qualitative Research (SRQR)\*

<http://www.equator-network.org/reporting-guidelines/srqr/>

Page/line no(s).

### Title and abstract

|                                                                                                                                                                                                                                                              |        |
|--------------------------------------------------------------------------------------------------------------------------------------------------------------------------------------------------------------------------------------------------------------|--------|
| <p><b>Title</b> - Concise description of the nature and topic of the study Identifying the study as qualitative or indicating the approach (e.g., ethnography, grounded theory) or data collection methods (e.g., interview, focus group) is recommended</p> | Page 1 |
| <p><b>Abstract</b> - Summary of key elements of the study using the abstract format of the intended publication; typically includes background, purpose, methods, results, and conclusions</p>                                                               | Page 3 |

### Introduction

|                                                                                                                                                                     |          |
|---------------------------------------------------------------------------------------------------------------------------------------------------------------------|----------|
| <p><b>Problem formulation</b> - Description and significance of the problem/phenomenon studied; review of relevant theory and empirical work; problem statement</p> | Page 6-7 |
| <p><b>Purpose or research question</b> - Purpose of the study and specific objectives or questions</p>                                                              | Page 7   |

### Methods

|                                                                                                                                                                                                                                                                                                                                                                                                             |         |
|-------------------------------------------------------------------------------------------------------------------------------------------------------------------------------------------------------------------------------------------------------------------------------------------------------------------------------------------------------------------------------------------------------------|---------|
| <p><b>Qualitative approach and research paradigm</b> - Qualitative approach (e.g., ethnography, grounded theory, case study, phenomenology, narrative research) and guiding theory if appropriate; identifying the research paradigm (e.g., postpositivist, constructivist/ interpretivist) is also recommended; rationale**</p>                                                                            | Page 8  |
| <p><b>Researcher characteristics and reflexivity</b> - Researchers' characteristics that may influence the research, including personal attributes, qualifications/experience, relationship with participants, assumptions, and/or presuppositions; potential or actual interaction between researchers' characteristics and the research questions, approach, methods, results, and/or transferability</p> | n/a     |
| <p><b>Context</b> - Setting/site and salient contextual factors; rationale**</p>                                                                                                                                                                                                                                                                                                                            | Page 8  |
| <p><b>Sampling strategy</b> - How and why research participants, documents, or events were selected; criteria for deciding when no further sampling was necessary (e.g., sampling saturation); rationale**</p>                                                                                                                                                                                              | Page 9  |
| <p><b>Ethical issues pertaining to human subjects</b> - Documentation of approval by an appropriate ethics review board and participant consent, or explanation for lack thereof; other confidentiality and data security issues</p>                                                                                                                                                                        | Page 8  |
| <p><b>Data collection methods</b> - Types of data collected; details of data collection procedures including (as appropriate) start and stop dates of data collection and analysis, iterative process, triangulation of sources/methods, and modification of procedures in response to evolving study findings; rationale**</p>                                                                             | Page 10 |

|                       |                                                                                                                                                                                                                                                       |            |
|-----------------------|-------------------------------------------------------------------------------------------------------------------------------------------------------------------------------------------------------------------------------------------------------|------------|
| 1<br>2<br>3<br>4<br>5 | <b>Data collection instruments and technologies</b> - Description of instruments (e.g., interview guides, questionnaires) and devices (e.g., audio recorders) used for data collection; if/how the instrument(s) changed over the course of the study | Page 10    |
| 6<br>7<br>8           | <b>Units of study</b> - Number and relevant characteristics of participants, documents, or events included in the study; level of participation (could be reported in results)                                                                        | Page 9     |
| 9<br>10<br>11<br>12   | <b>Data processing</b> - Methods for processing data prior to and during analysis, including transcription, data entry, data management and security, verification of data integrity, data coding, and anonymization/de-identification of excerpts    | Page 10-11 |
| 13<br>14<br>15<br>16  | <b>Data analysis</b> - Process by which inferences, themes, etc., were identified and developed, including the researchers involved in data analysis; usually references a specific paradigm or approach; rationale**                                 | Page 10-11 |
| 17<br>18<br>19<br>20  | <b>Techniques to enhance trustworthiness</b> - Techniques to enhance trustworthiness and credibility of data analysis (e.g., member checking, audit trail, triangulation); rationale**                                                                | Page 10-11 |

### Results/findings

|                      |                                                                                                                                                                                                   |             |
|----------------------|---------------------------------------------------------------------------------------------------------------------------------------------------------------------------------------------------|-------------|
| 23<br>24<br>25<br>26 | <b>Synthesis and interpretation</b> - Main findings (e.g., interpretations, inferences, and themes); might include development of a theory or model, or integration with prior research or theory | Pages 11-19 |
| 27<br>28<br>29       | <b>Links to empirical data</b> - Evidence (e.g., quotes, field notes, text excerpts, photographs) to substantiate analytic findings                                                               | Pages 11-19 |

### Discussion

|                                  |                                                                                                                                                                                                                                                                                                                                                                                                             |             |
|----------------------------------|-------------------------------------------------------------------------------------------------------------------------------------------------------------------------------------------------------------------------------------------------------------------------------------------------------------------------------------------------------------------------------------------------------------|-------------|
| 32<br>33<br>34<br>35<br>36<br>37 | <b>Integration with prior work, implications, transferability, and contribution(s) to the field</b> - Short summary of main findings; explanation of how findings and conclusions connect to, support, elaborate on, or challenge conclusions of earlier scholarship; discussion of scope of application/generalizability; identification of unique contribution(s) to scholarship in a discipline or field | Pages 19-21 |
| 38<br>39                         | <b>Limitations</b> - Trustworthiness and limitations of findings                                                                                                                                                                                                                                                                                                                                            | Pages 20    |

### Other

|                |                                                                                                                                               |        |
|----------------|-----------------------------------------------------------------------------------------------------------------------------------------------|--------|
| 42<br>43<br>44 | <b>Conflicts of interest</b> - Potential sources of influence or perceived influence on study conduct and conclusions; how these were managed | n/a    |
| 45<br>46       | <b>Funding</b> - Sources of funding and other support; role of funders in data collection, interpretation, and reporting                      | Page 2 |

\*The authors created the SRQR by searching the literature to identify guidelines, reporting standards, and critical appraisal criteria for qualitative research; reviewing the reference lists of retrieved sources; and contacting experts to gain feedback. The SRQR aims to improve the transparency of all aspects of qualitative research by providing clear standards for reporting qualitative research.

1  
2  
3  
4  
5  
6  
7  
8  
9  
10  
11  
12  
13  
14  
15  
16  
17  
18  
19  
20  
21  
22  
23  
24  
25  
26  
27  
28  
29  
30  
31  
32  
33  
34  
35  
36  
37  
38  
39  
40  
41  
42  
43  
44  
45  
46  
47  
48  
49  
50  
51  
52  
53  
54  
55  
56  
57  
58  
59  
60

\*\*The rationale should briefly discuss the justification for choosing that theory, approach, method, or technique rather than other options available, the assumptions and limitations implicit in those choices, and how those choices influence study conclusions and transferability. As appropriate, the rationale for several items might be discussed together.

**Reference:**

O'Brien BC, Harris IB, Beckman TJ, Reed DA, Cook DA. **Standards for reporting qualitative research: a synthesis of recommendations.** *Academic Medicine*, Vol. 89, No. 9 / Sept 2014  
DOI: 10.1097/ACM.0000000000000388

For peer review only
